# Supplementary material for: DBSA catalyzed, one-pot three-component “on water” green protocol for the synthesis of 2,3-disubstituted 4-thiazolidinones
Source: Royal Society of Chemistry journal article supplement (doi:10.1039/c2ra20171b), 2012-01-01
Supplement: c2ra20171b.pdf [file c2ra20171b.pdf]

## Supporting Information

### **DBSA catalyzed one-pot three component “on water” green protocol for the synthesis of 2,3-disubstituted 4-thiazolidinones**

**Davinder Prasad, Amreeta Preetam and Mahendra Nath\***

*Department of Chemistry, University of Delhi, Delhi 110007, India*

*\*E-mail: [mnath@chemistry.du.ac.in](mailto:mnath@chemistry.du.ac.in)*

| <b>S.No.</b> | <b>List of Figures</b>                    | <b>Page No.</b> |
|--------------|-------------------------------------------|-----------------|
| 1            | $^1\text{H}$ NMR spectrum of <b>4a</b>    | 3               |
| 2            | $^{13}\text{C}$ NMR spectrum of <b>4a</b> | 4               |
| 3            | $^1\text{H}$ NMR spectrum of <b>4b</b>    | 5               |
| 4            | $^{13}\text{C}$ NMR spectrum of <b>4b</b> | 6               |
| 5            | $^1\text{H}$ NMR spectrum of <b>4c</b>    | 7               |
| 6            | $^{13}\text{C}$ NMR spectrum of <b>4c</b> | 8               |
| 7            | $^1\text{H}$ NMR spectrum of <b>4d</b>    | 9               |
| 8            | $^{13}\text{C}$ NMR spectrum of <b>4d</b> | 10              |
| 9            | $^1\text{H}$ NMR spectrum of <b>4e</b>    | 11              |
| 10           | $^{13}\text{C}$ NMR spectrum of <b>4e</b> | 12              |
| 11           | $^1\text{H}$ NMR spectrum of <b>4f</b>    | 13              |
| 12           | $^{13}\text{C}$ NMR spectrum of <b>4f</b> | 14              |
| 13           | $^1\text{H}$ NMR spectrum of <b>4g</b>    | 15              |
| 14           | $^{13}\text{C}$ NMR spectrum of <b>4g</b> | 16              |
| 15           | DEPT NMR spectrum of <b>4g</b>            | 17              |
| 16           | $^1\text{H}$ NMR spectrum of <b>4h</b>    | 18              |
| 17           | $^{13}\text{C}$ NMR spectrum of <b>4h</b> | 19              |
| 18           | $^1\text{H}$ NMR spectrum of <b>4i</b>    | 20              |
| 19           | $^{13}\text{C}$ NMR spectrum of <b>4i</b> | 21              |
| 20           | $^1\text{H}$ NMR spectrum of <b>4j</b>    | 22              |
| 21           | $^{13}\text{C}$ NMR spectrum of <b>4j</b> | 23              |
| 22           | $^1\text{H}$ NMR spectrum of <b>4k</b>    | 24              |
| 23           | $^{13}\text{C}$ NMR spectrum of <b>4k</b> | 25              |

| <b>S.No.</b> | <b>List of Figures</b>                    | <b>Page No.</b> |
|--------------|-------------------------------------------|-----------------|
| 24           | $^1\text{H}$ NMR spectrum of <b>4l</b>    | 26              |
| 25           | $^{13}\text{C}$ NMR spectrum of <b>4l</b> | 27              |
| 26           | $^1\text{H}$ NMR spectrum of <b>4m</b>    | 28              |
| 27           | $^{13}\text{C}$ NMR spectrum of <b>4m</b> | 29              |
| 28           | $^1\text{H}$ NMR spectrum of <b>4n</b>    | 30              |
| 29           | $^{13}\text{C}$ NMR spectrum of <b>4n</b> | 31              |
| 30           | $^1\text{H}$ NMR spectrum of <b>4o</b>    | 32              |
| 31           | $^{13}\text{C}$ NMR spectrum of <b>4o</b> | 33              |

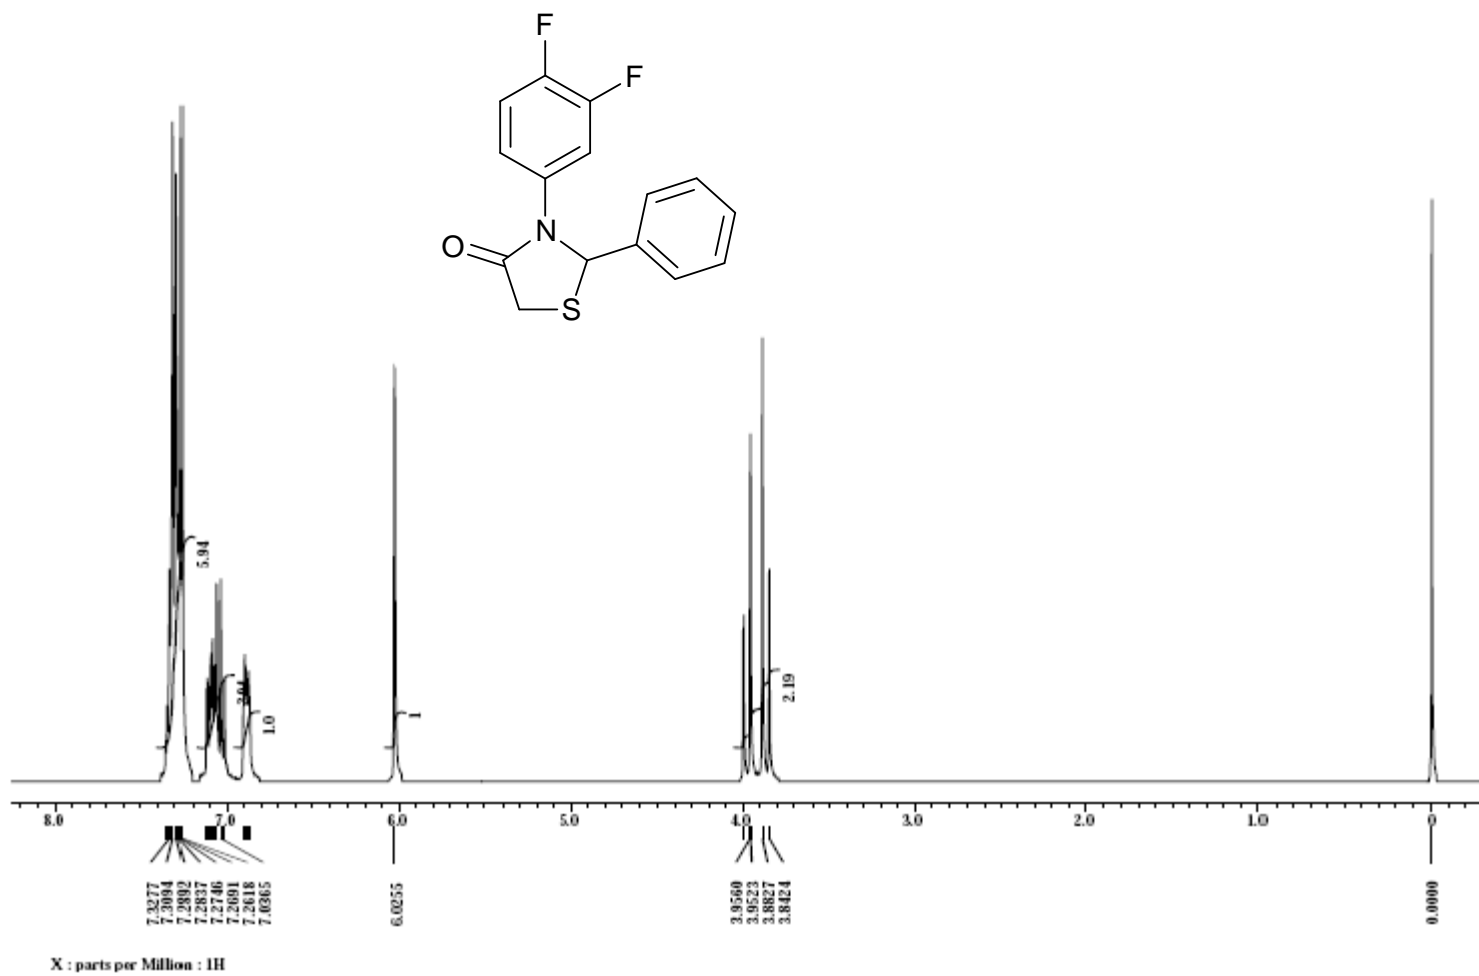

Figure 1. <sup>1</sup>H NMR spectrum of 4a

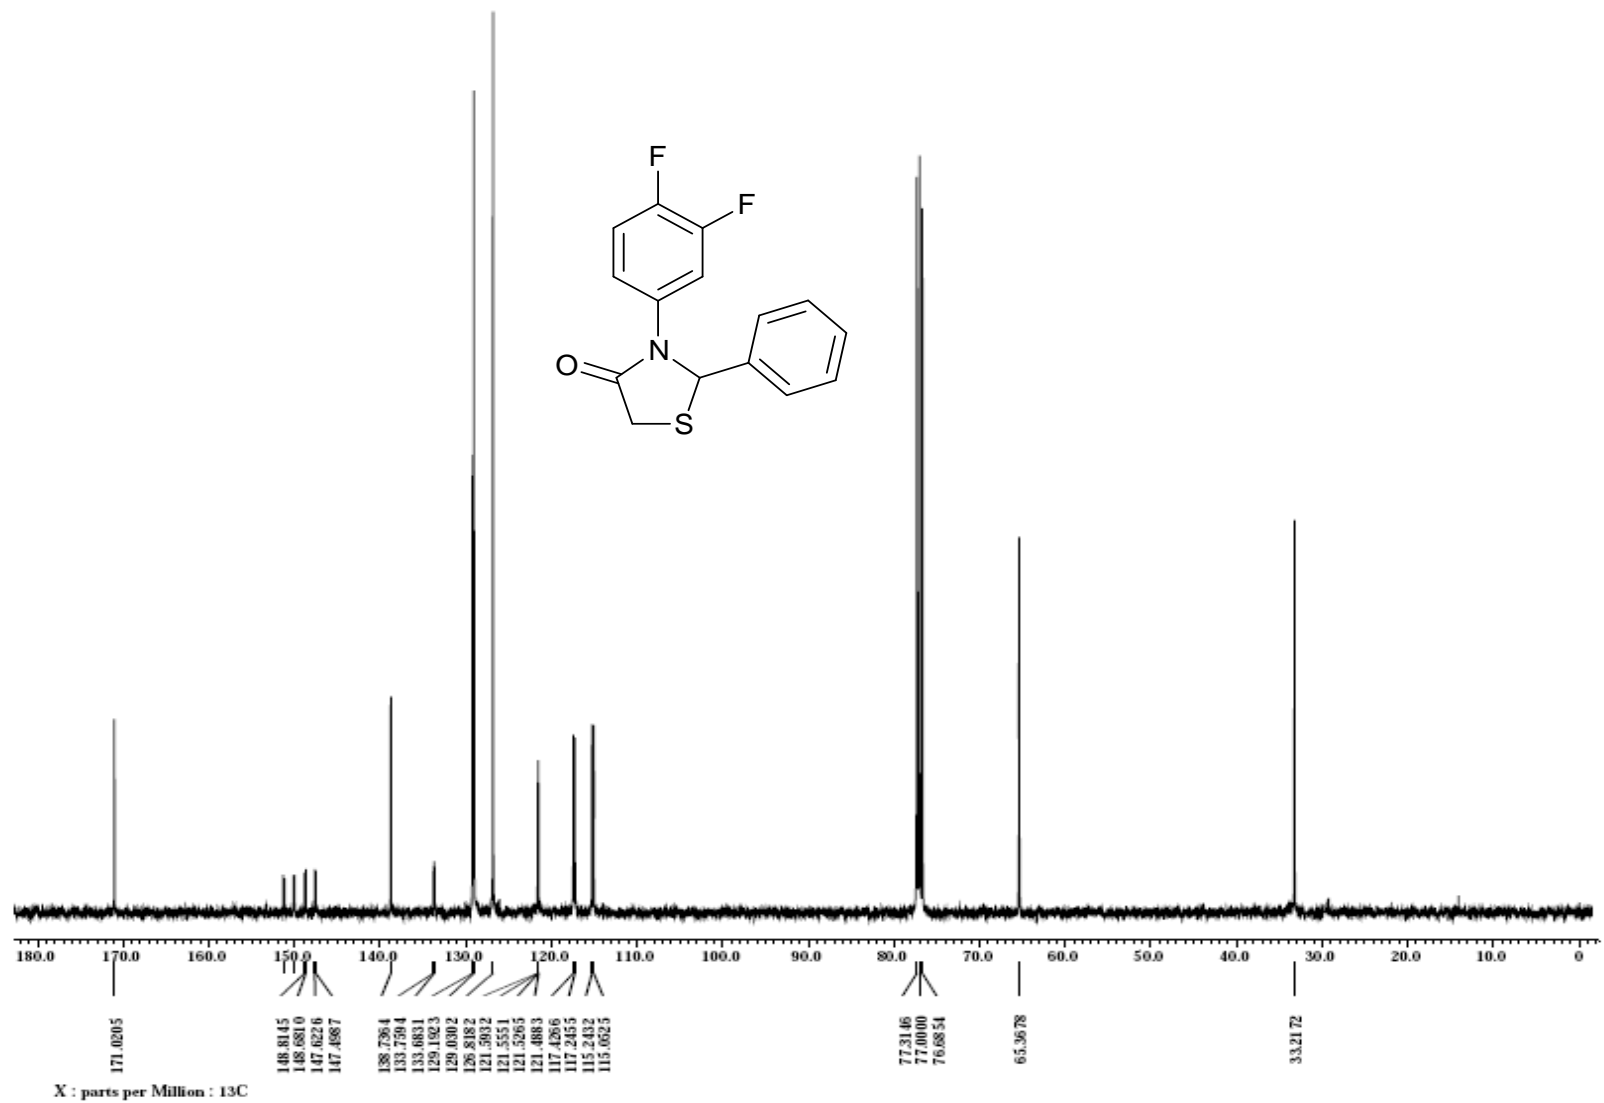

Figure 2.  $^{13}\text{C}$  NMR spectrum of **4a**

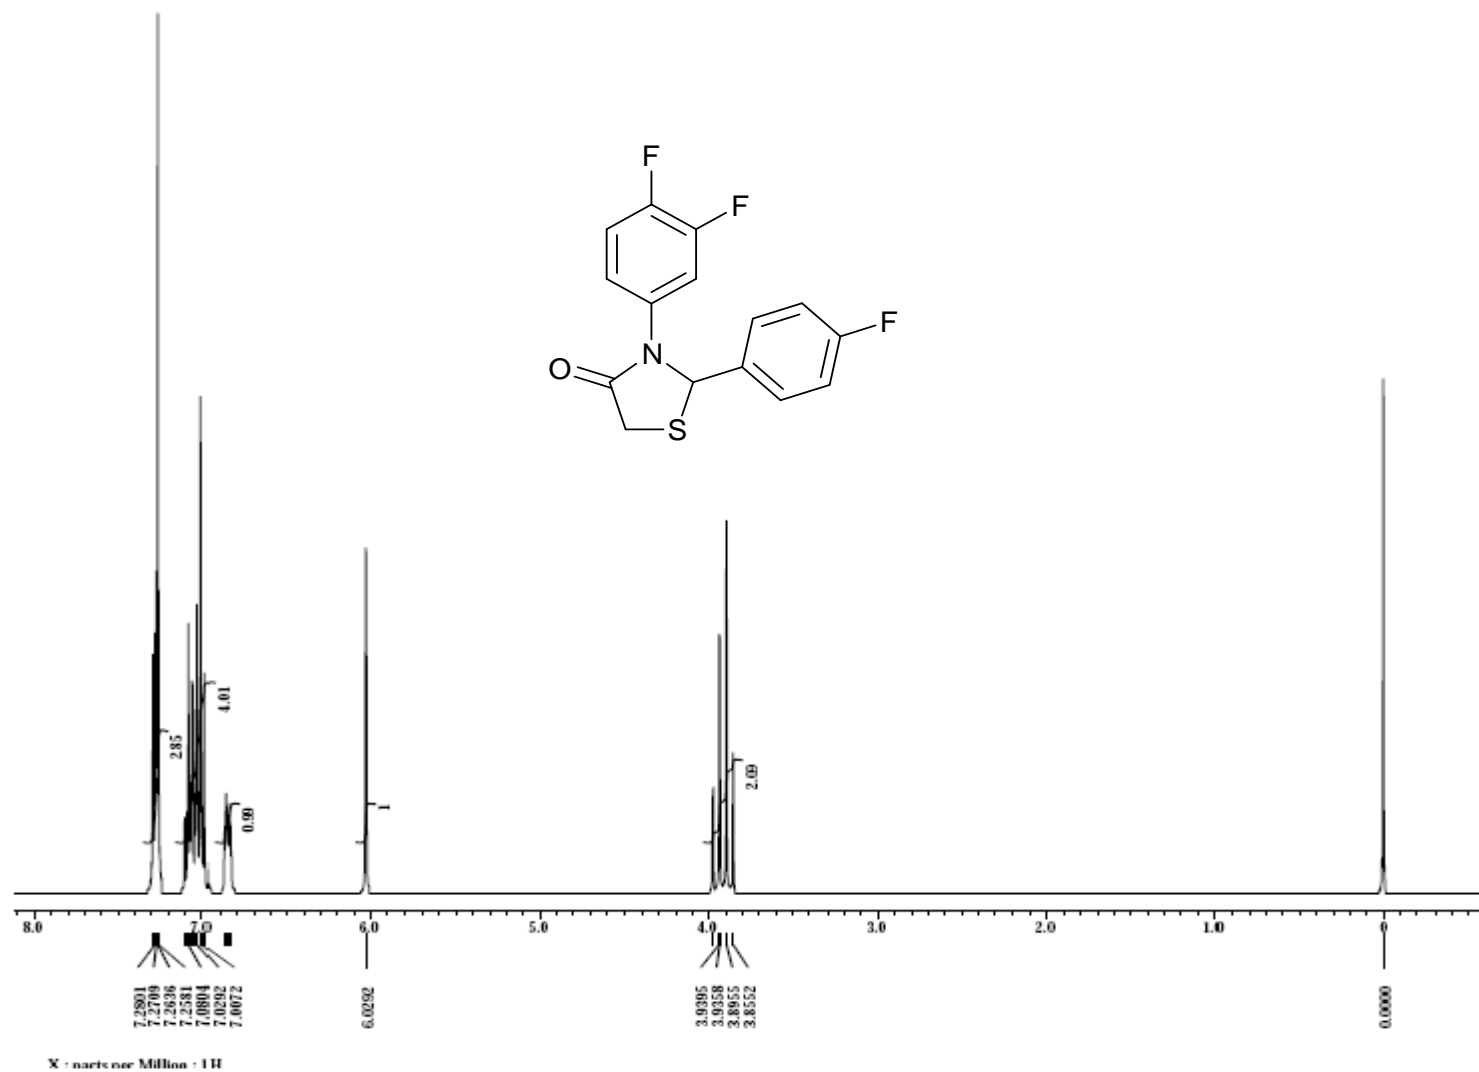

Figure 3. <sup>1</sup>H NMR spectrum of **4b**

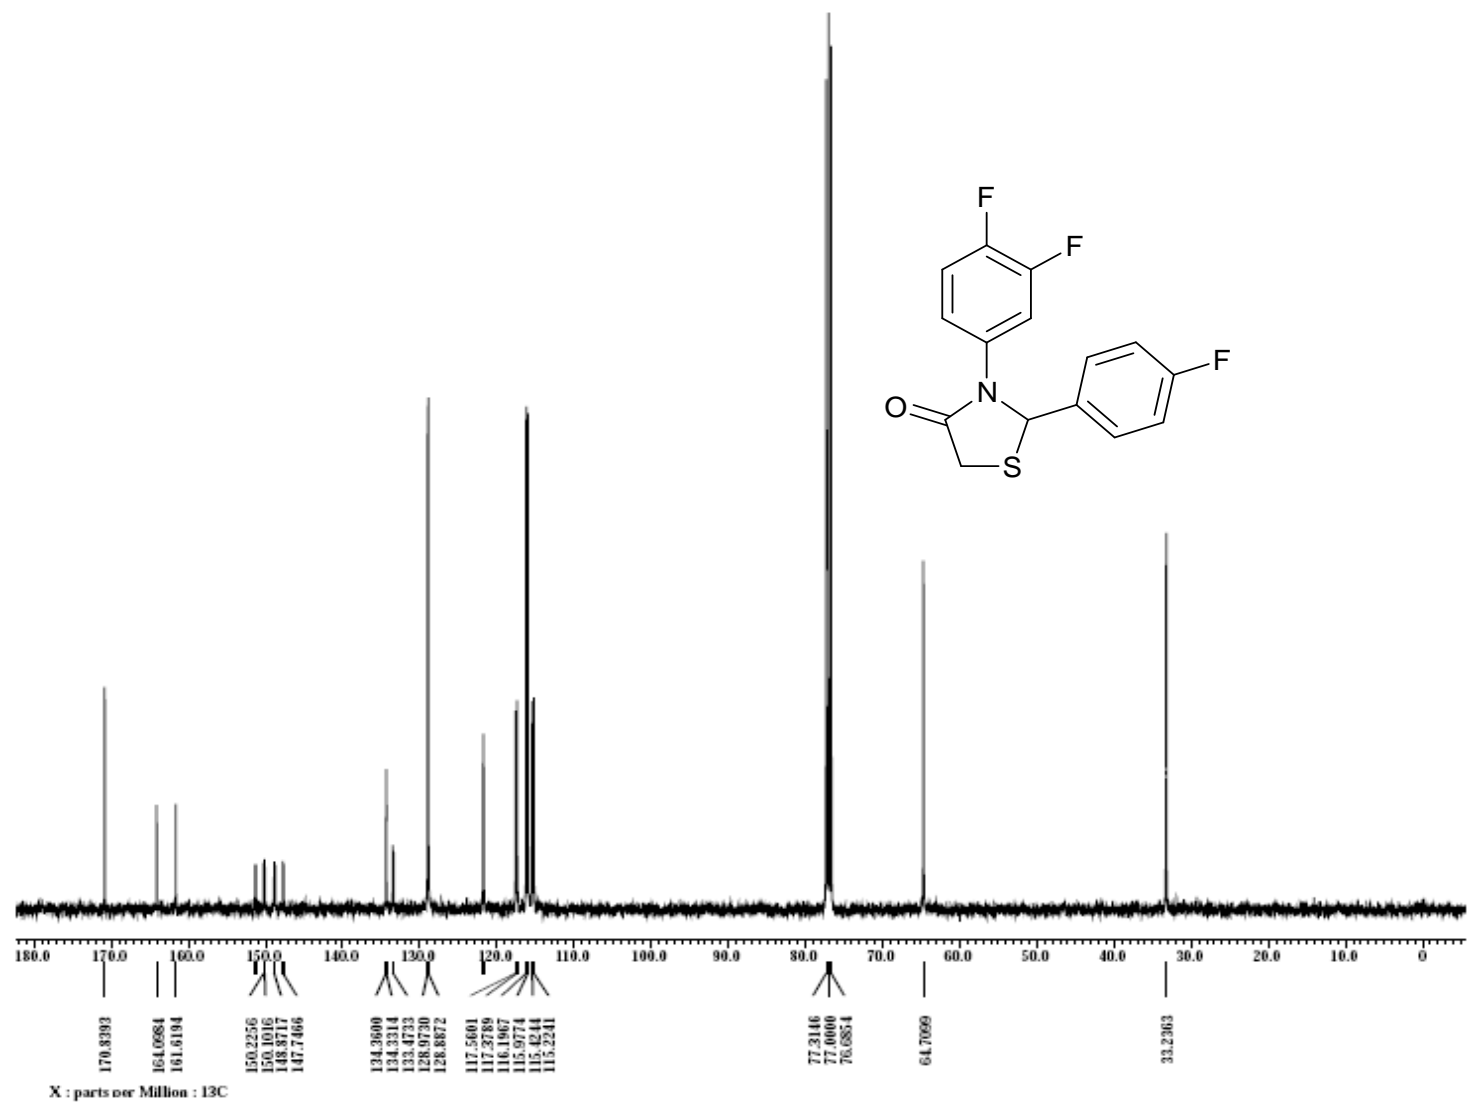

Figure 4.  $^{13}\text{C}$  NMR spectrum of **4b**

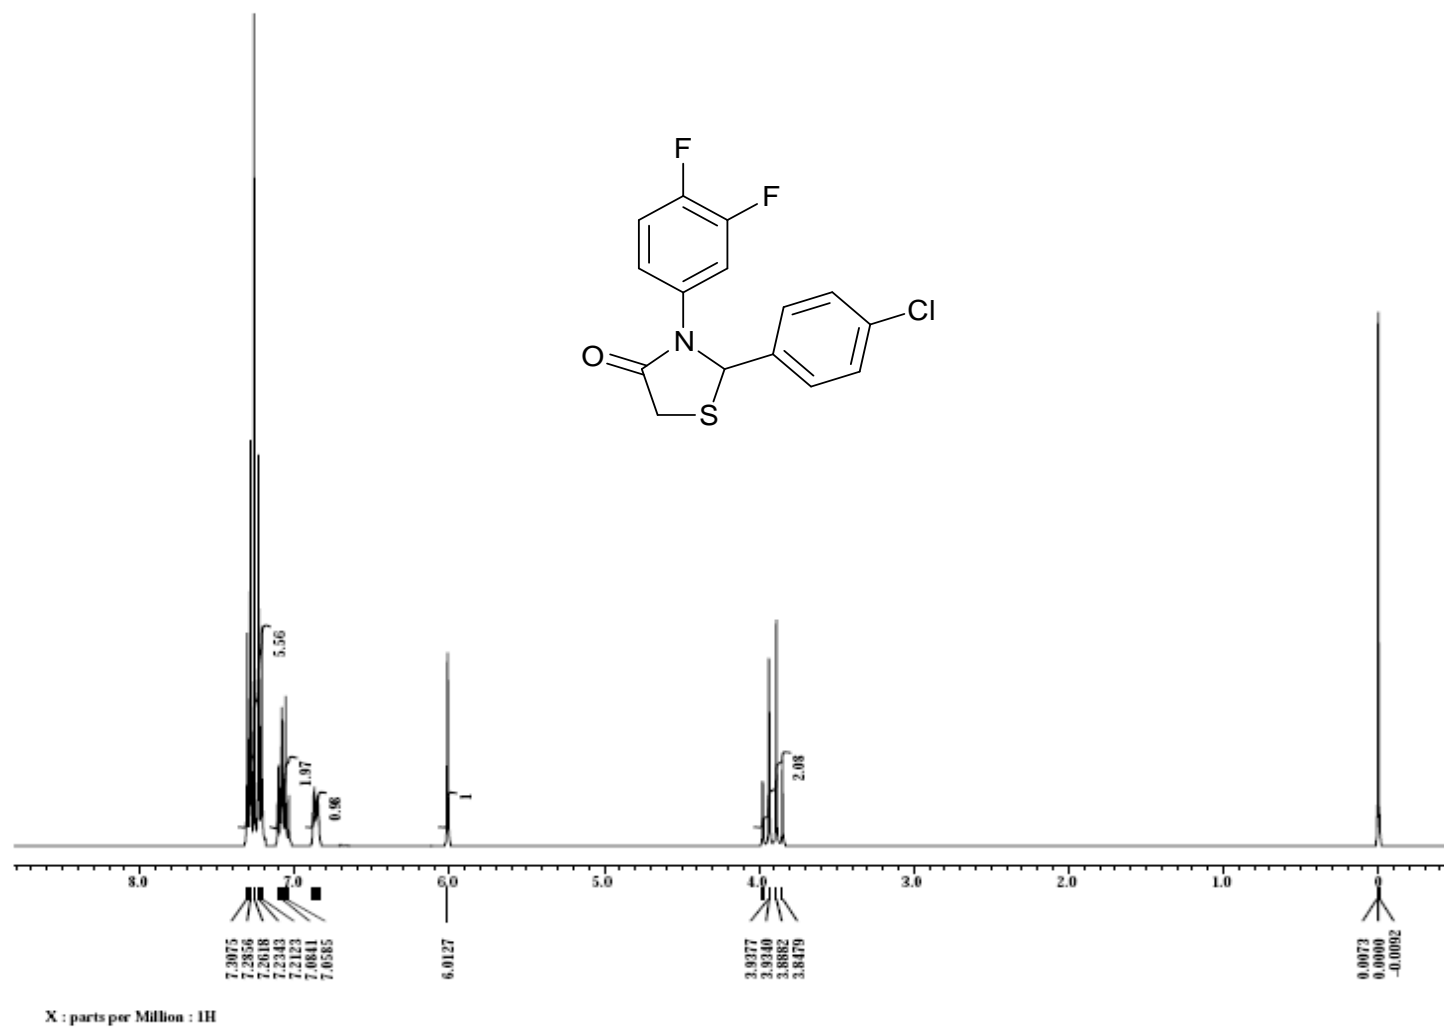

Figure 5. <sup>1</sup>H NMR spectrum of **4c**



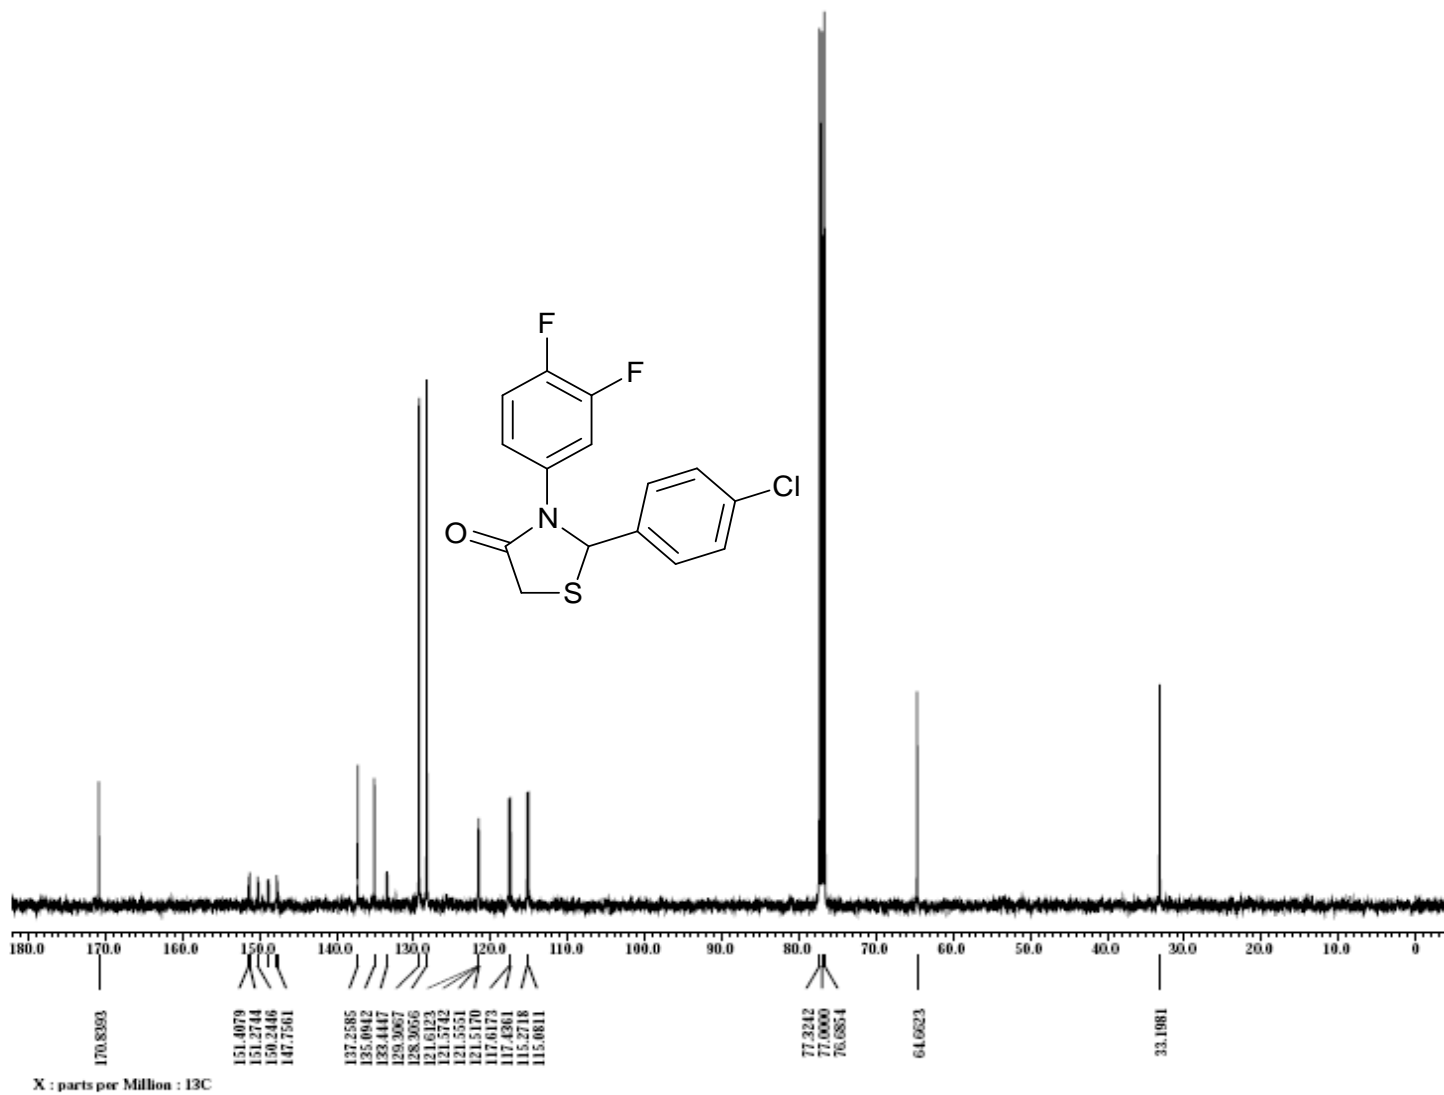

Figure 6. <sup>13</sup>C NMR spectrum of **4c**

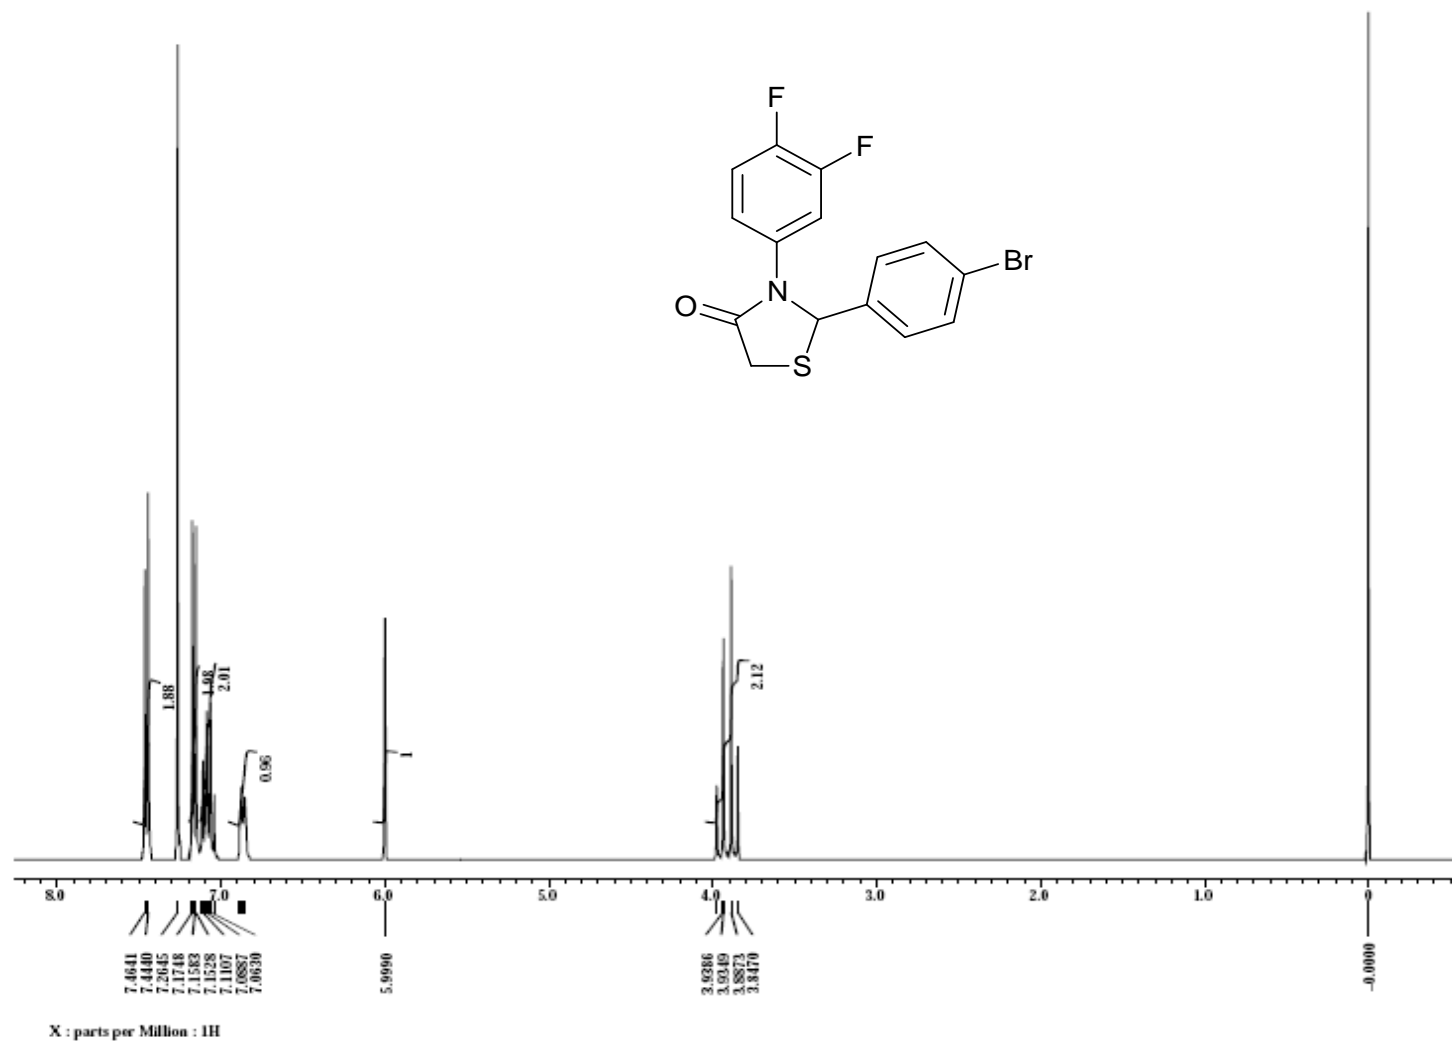

Figure 7.  $^1\text{H}$  NMR spectrum of **4d**

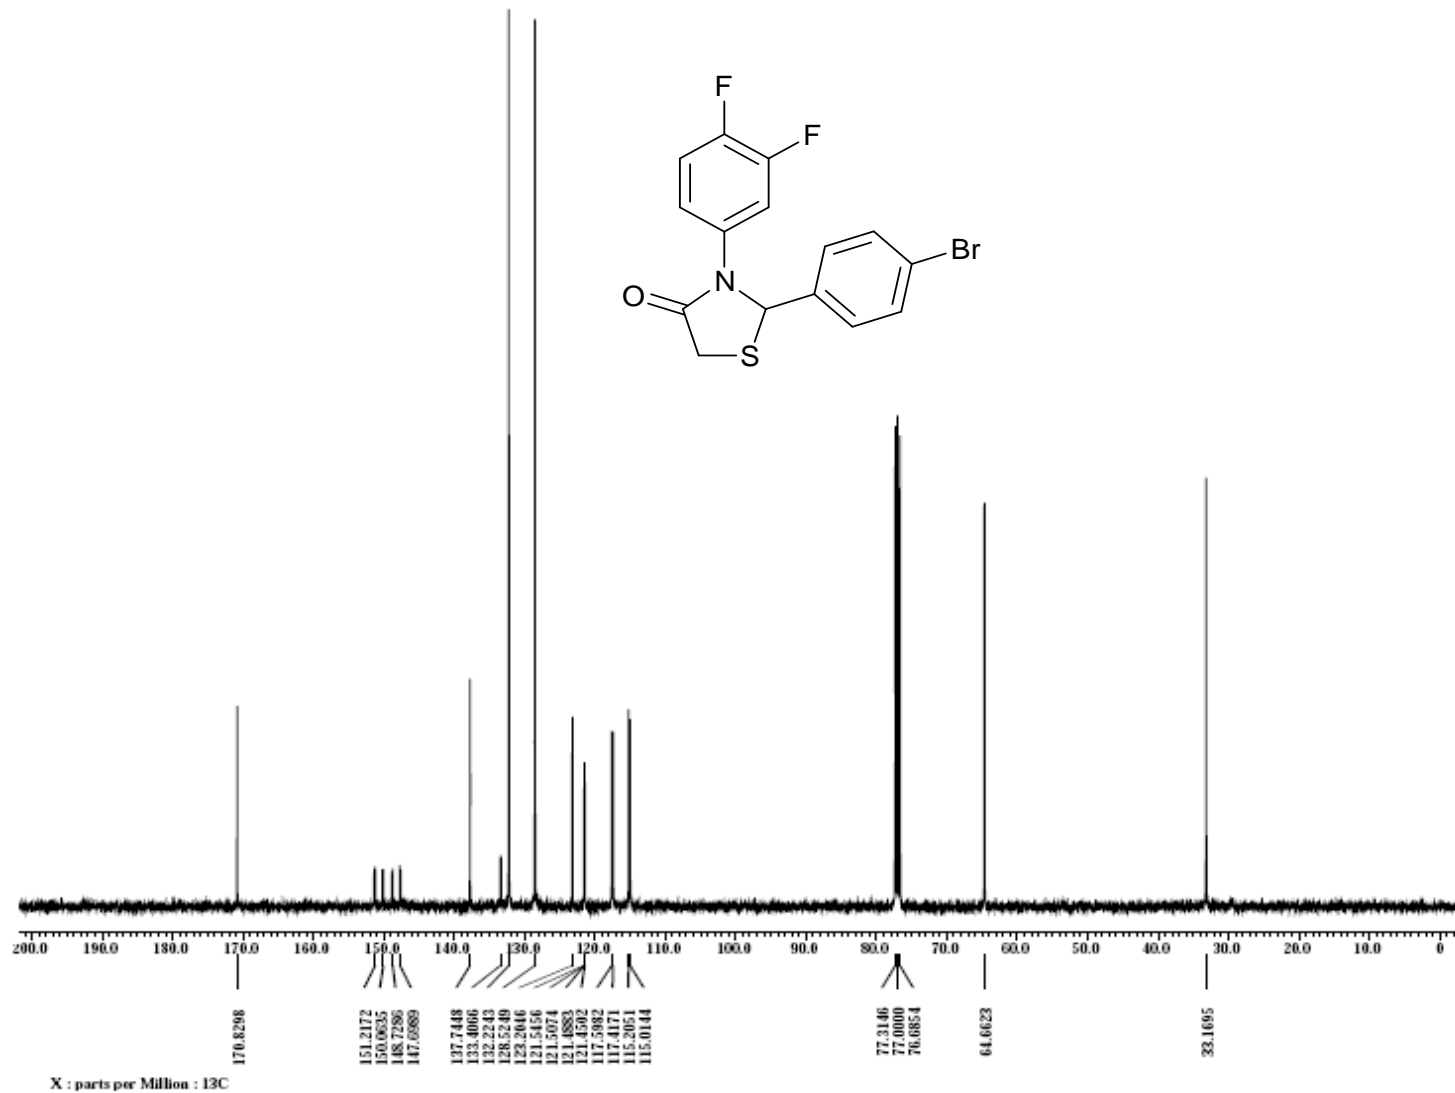

Figure 8.  $^{13}\text{C}$  NMR spectrum of **4d**

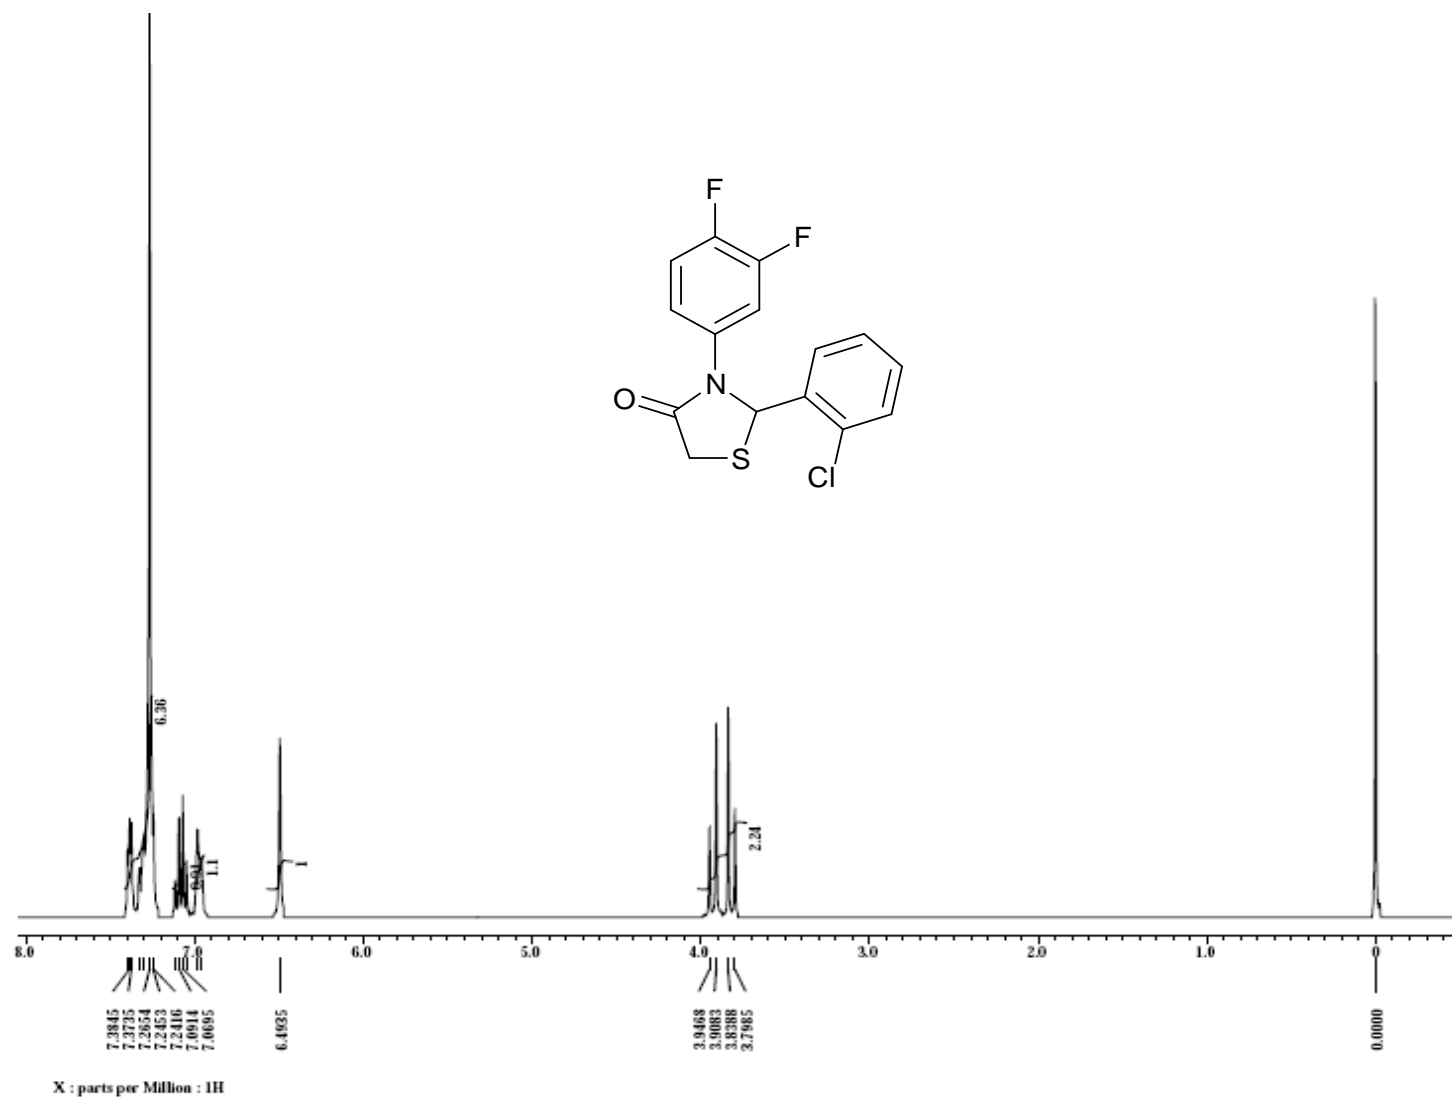

Figure 9. <sup>1</sup>H NMR spectrum of **4e**

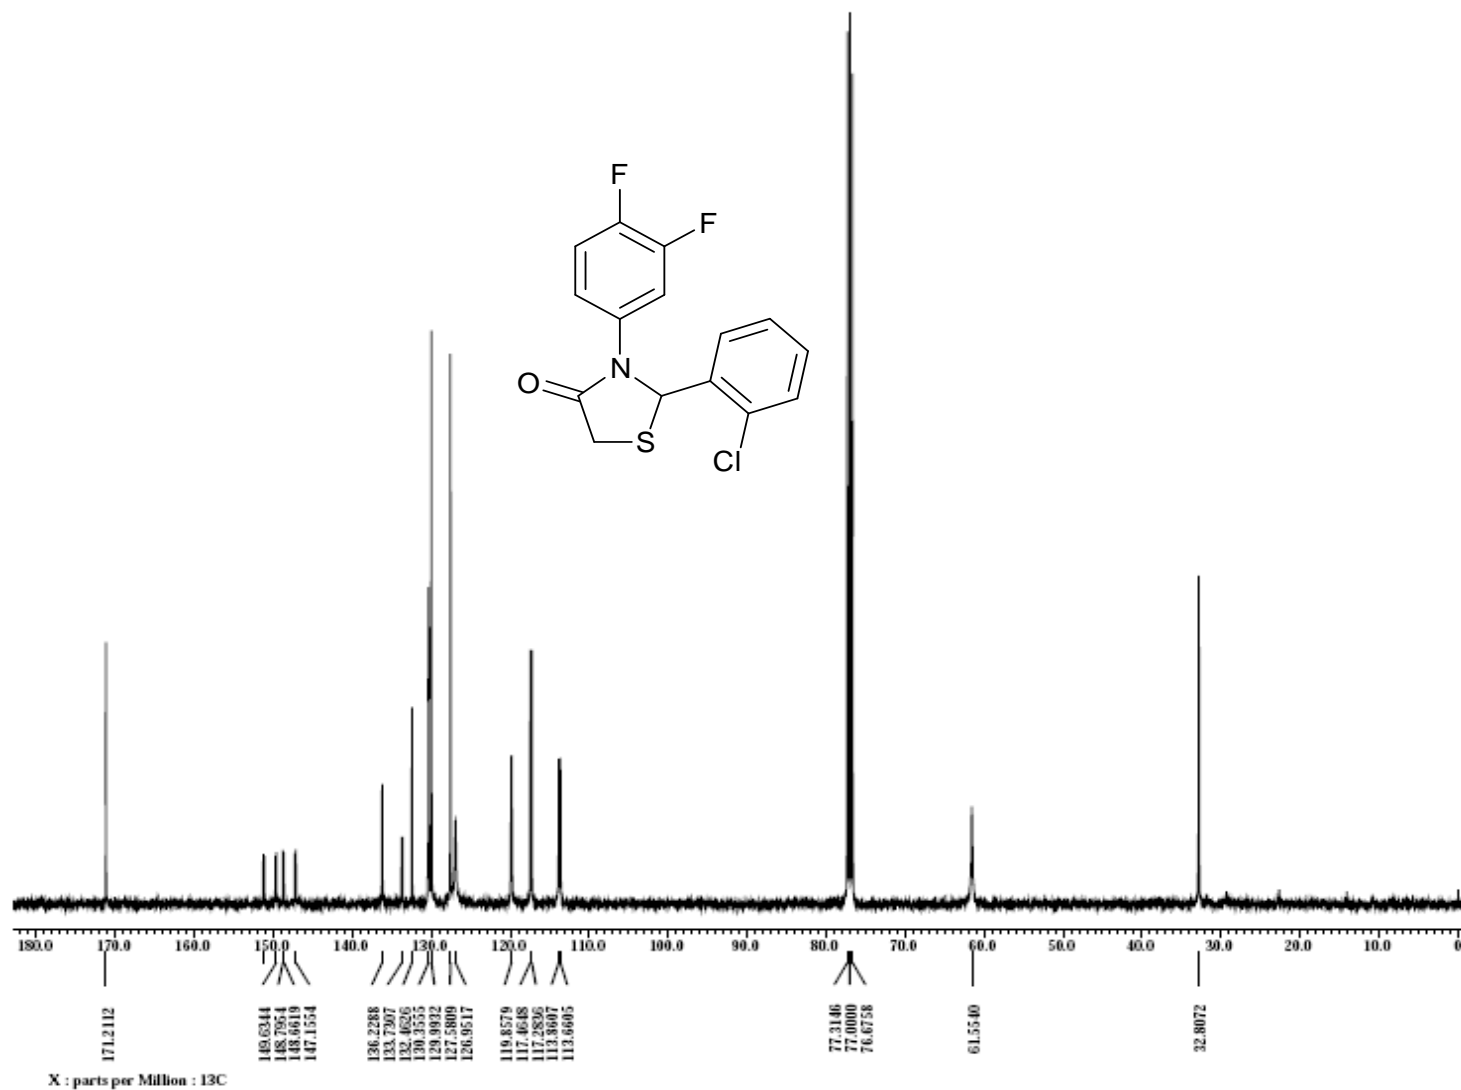

Figure 10.  $^{13}\text{C}$  NMR spectrum of **4e**

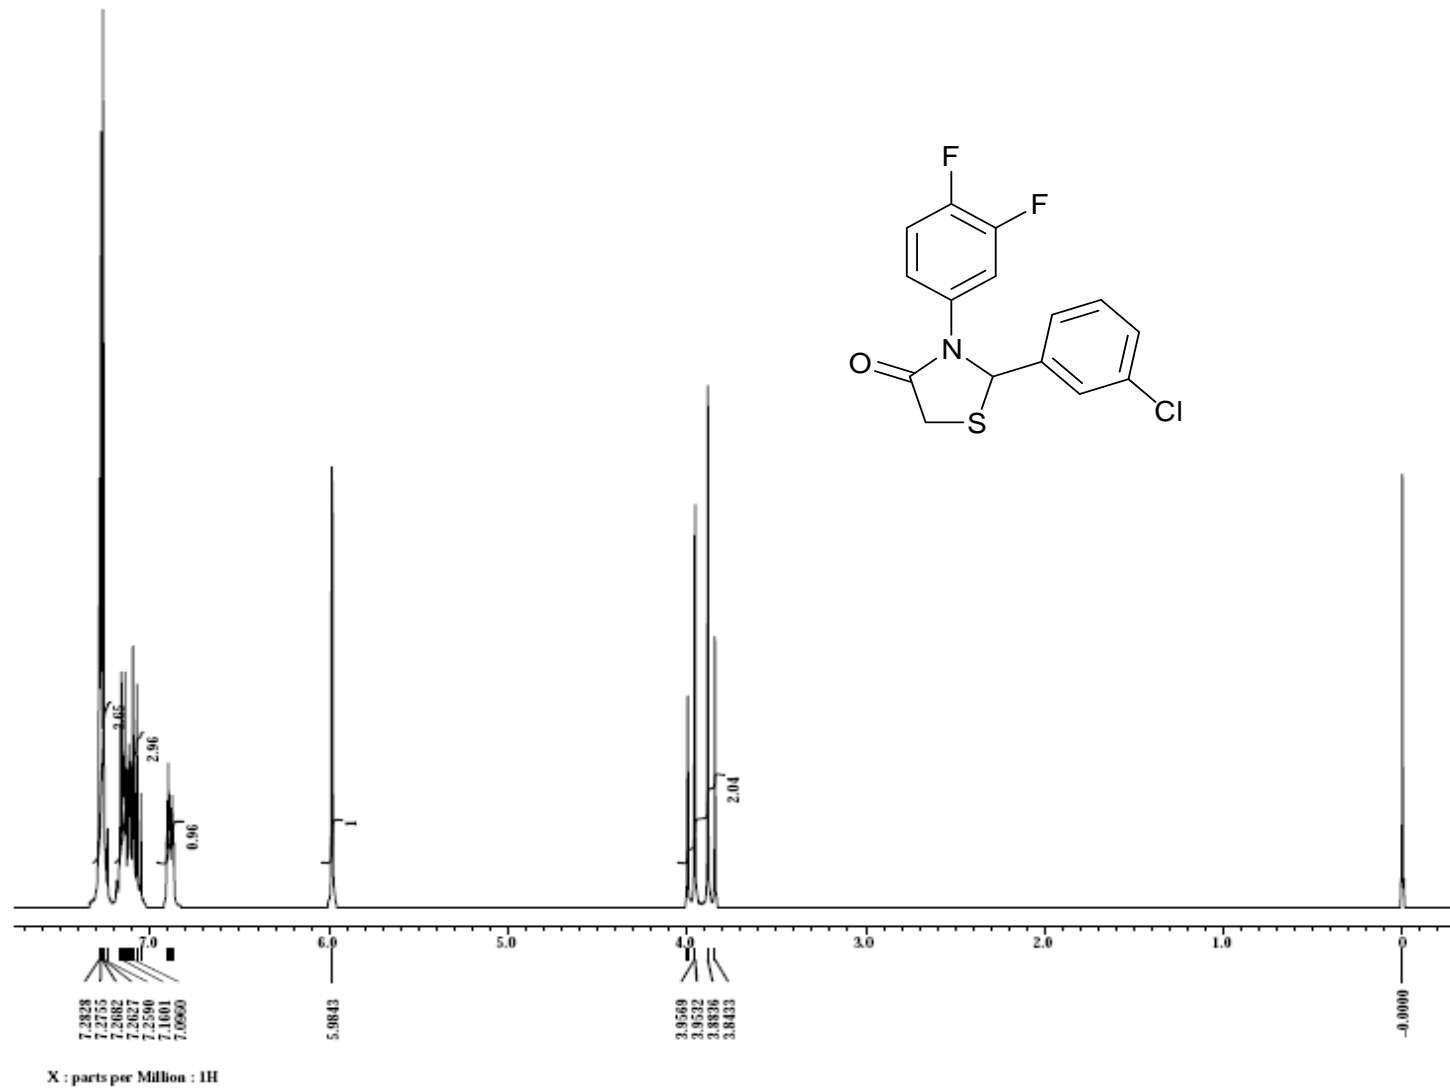

Figure 11. <sup>1</sup>H NMR spectrum of **4f**

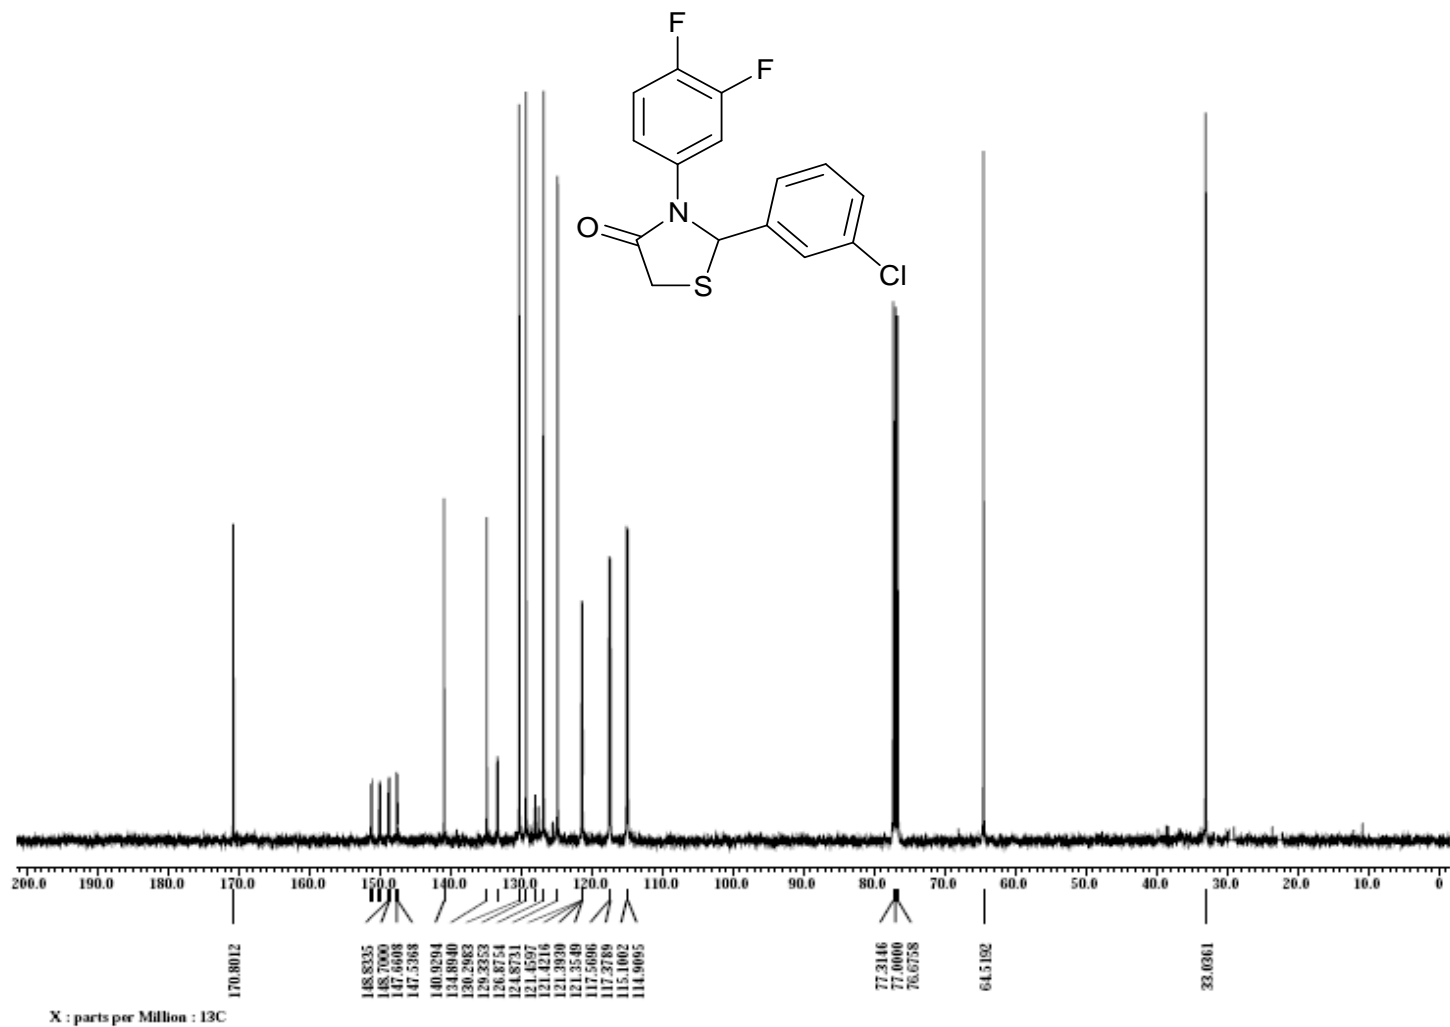

Figure 12.  $^{13}\text{C}$  NMR spectrum of **4f**

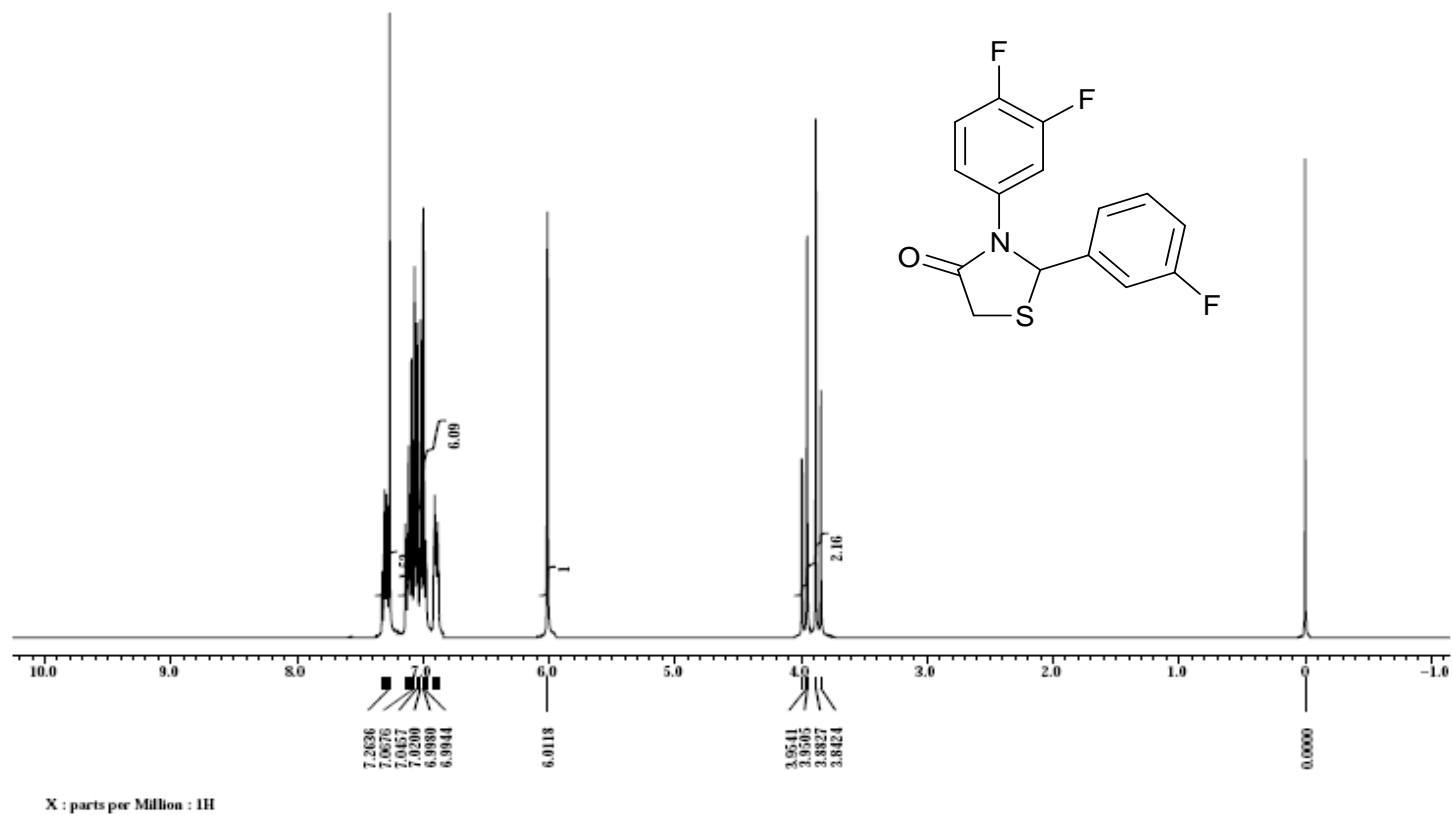

Figure 13.  $^1\text{H}$  NMR spectrum of **4g**



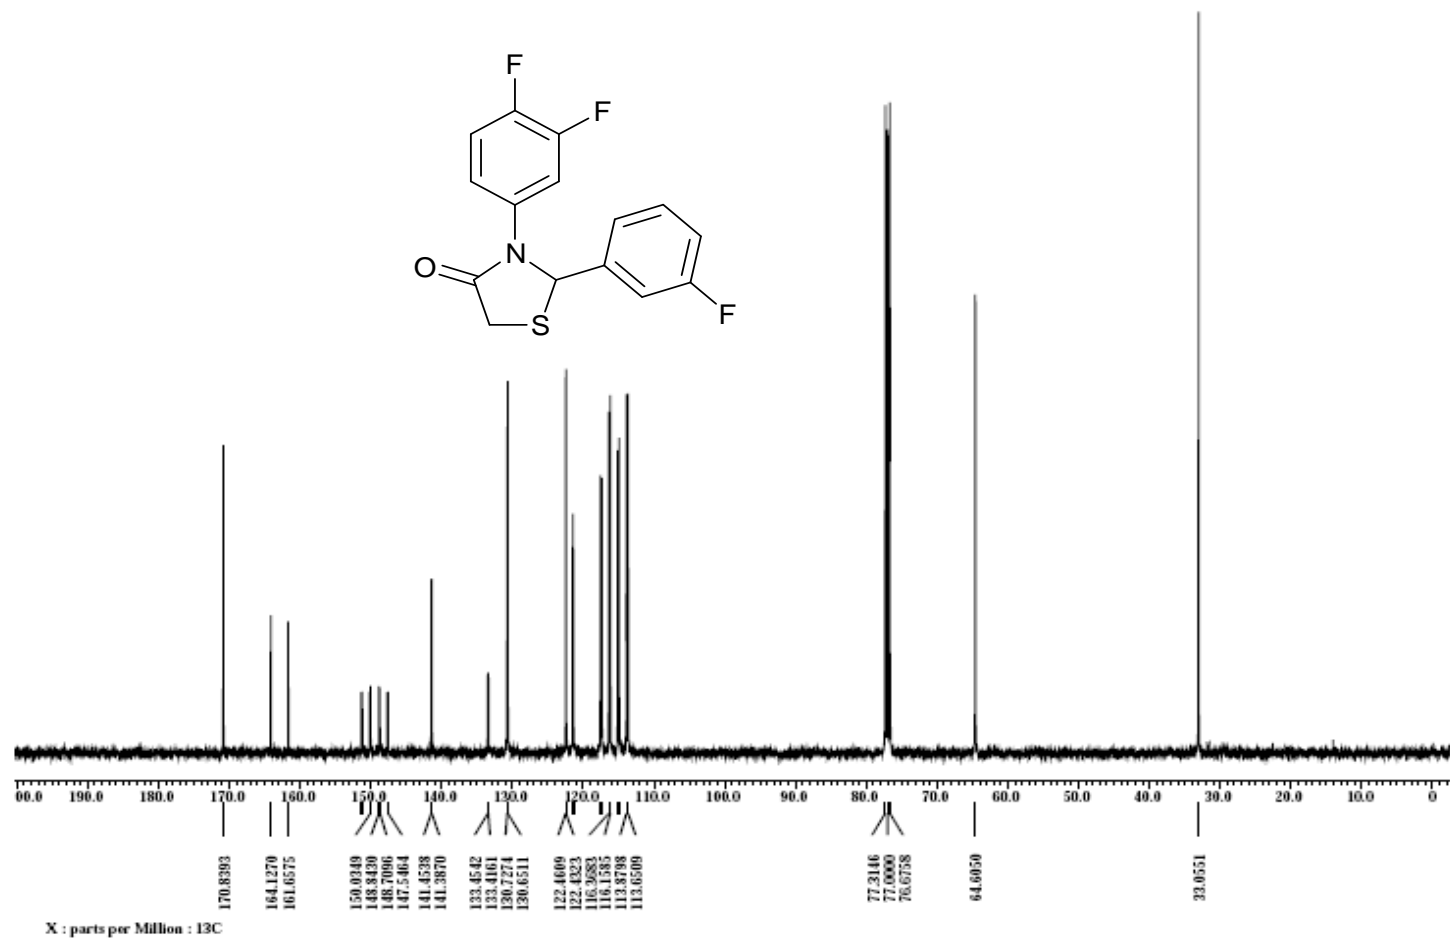

Figure 14.  $^{13}\text{C}$  NMR spectrum of **4g**

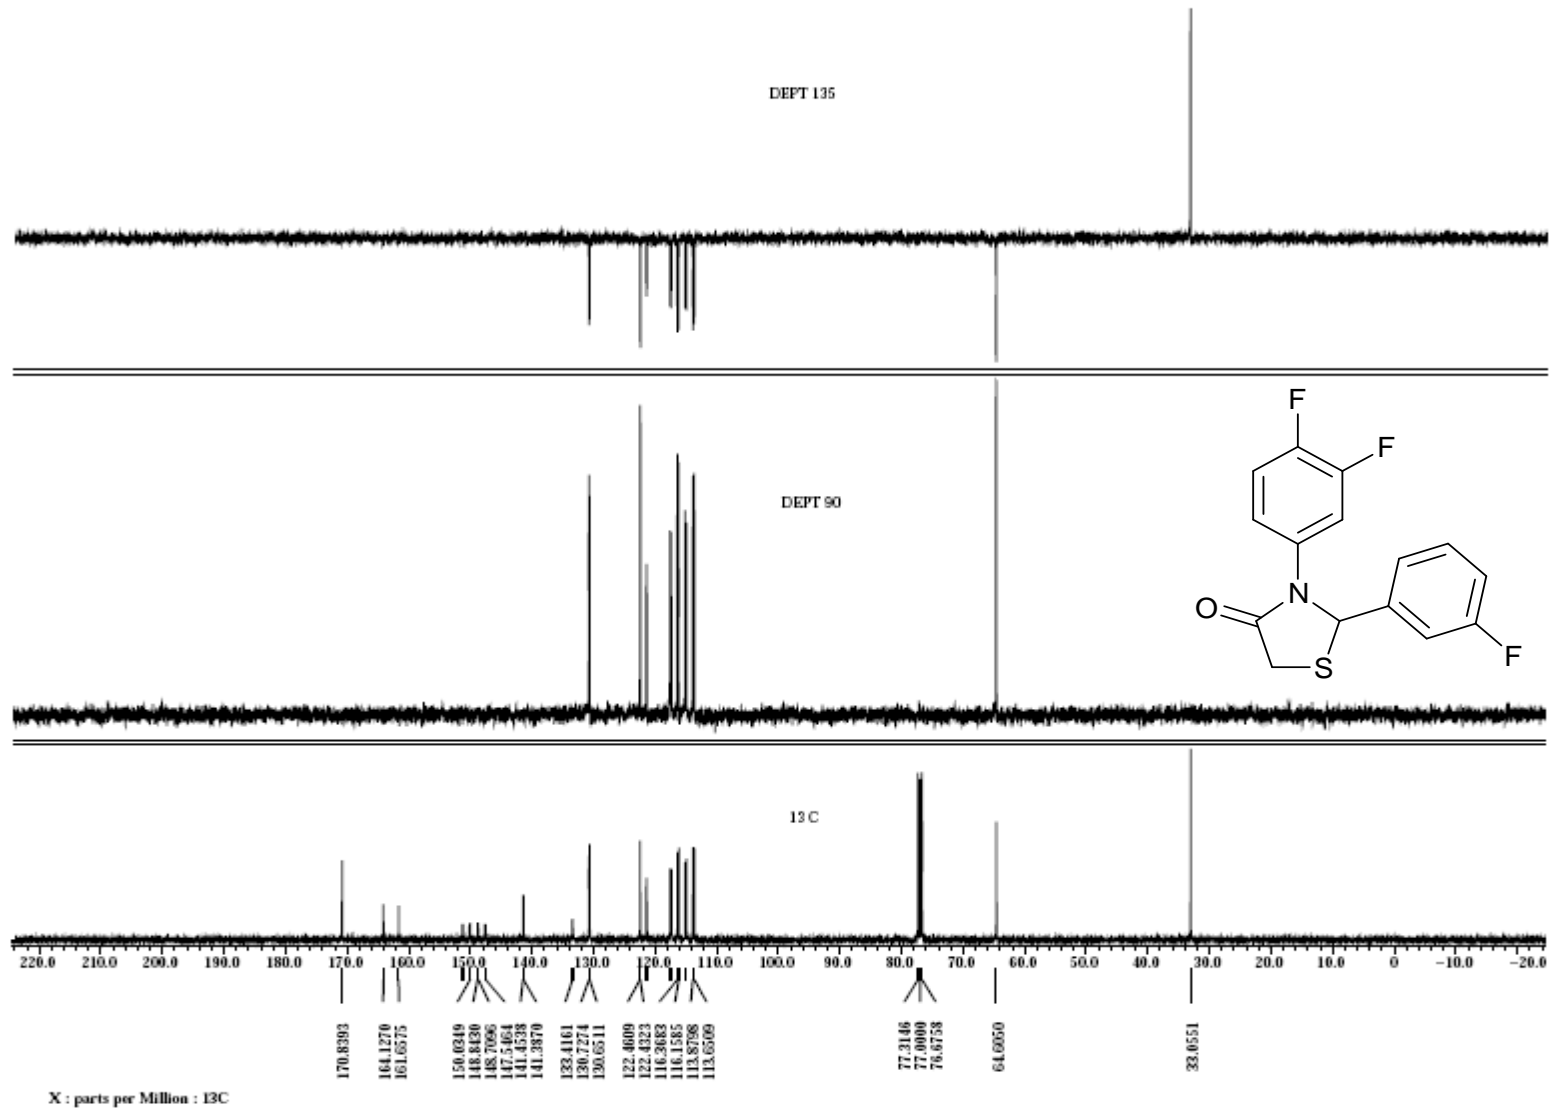

Figure 15. DEPT NMR spectrum of **4g**

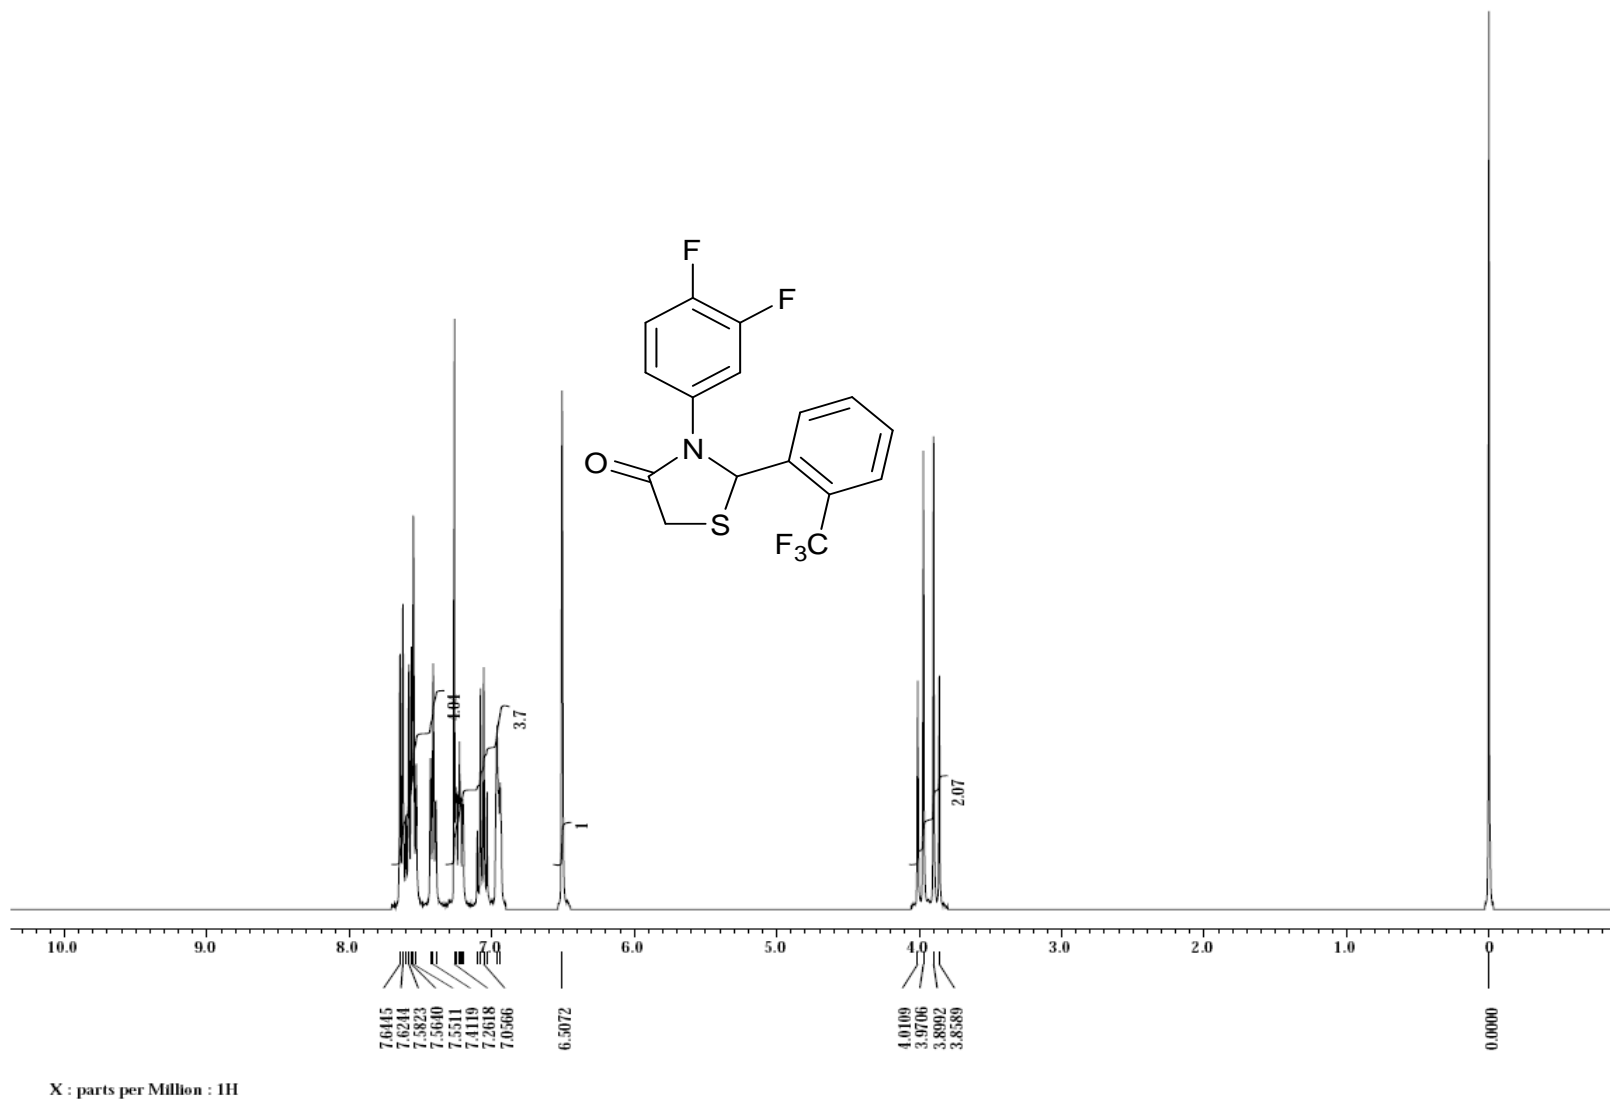

Figure 16. <sup>1</sup>H NMR spectrum of **4h**

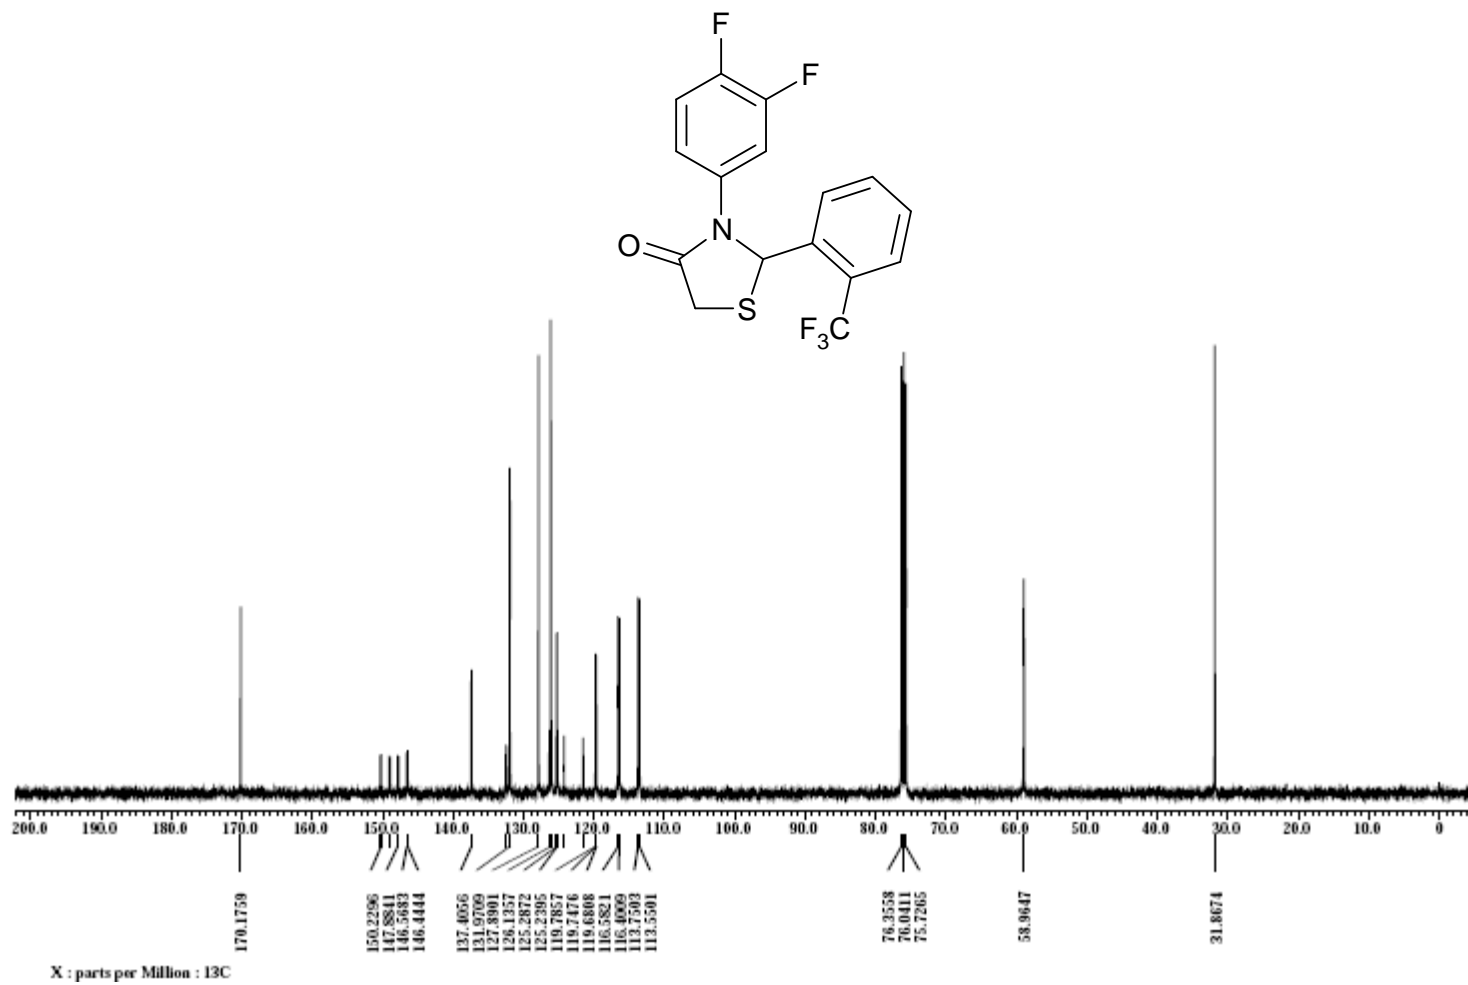

Figure 17. <sup>13</sup>C NMR spectrum of **4h**

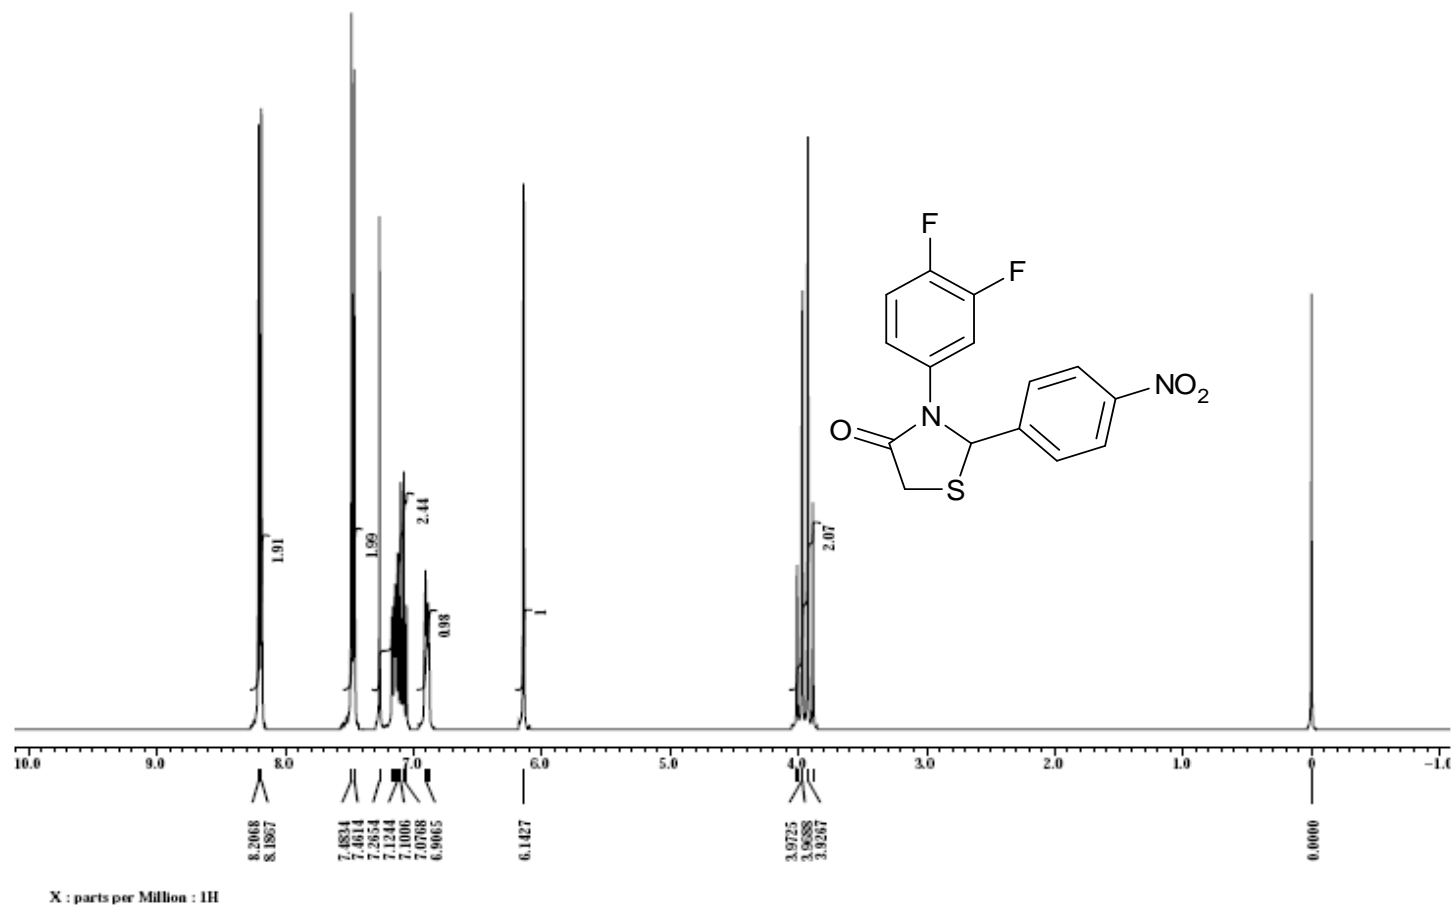

Figure 18. <sup>1</sup>H NMR spectrum of **4i**

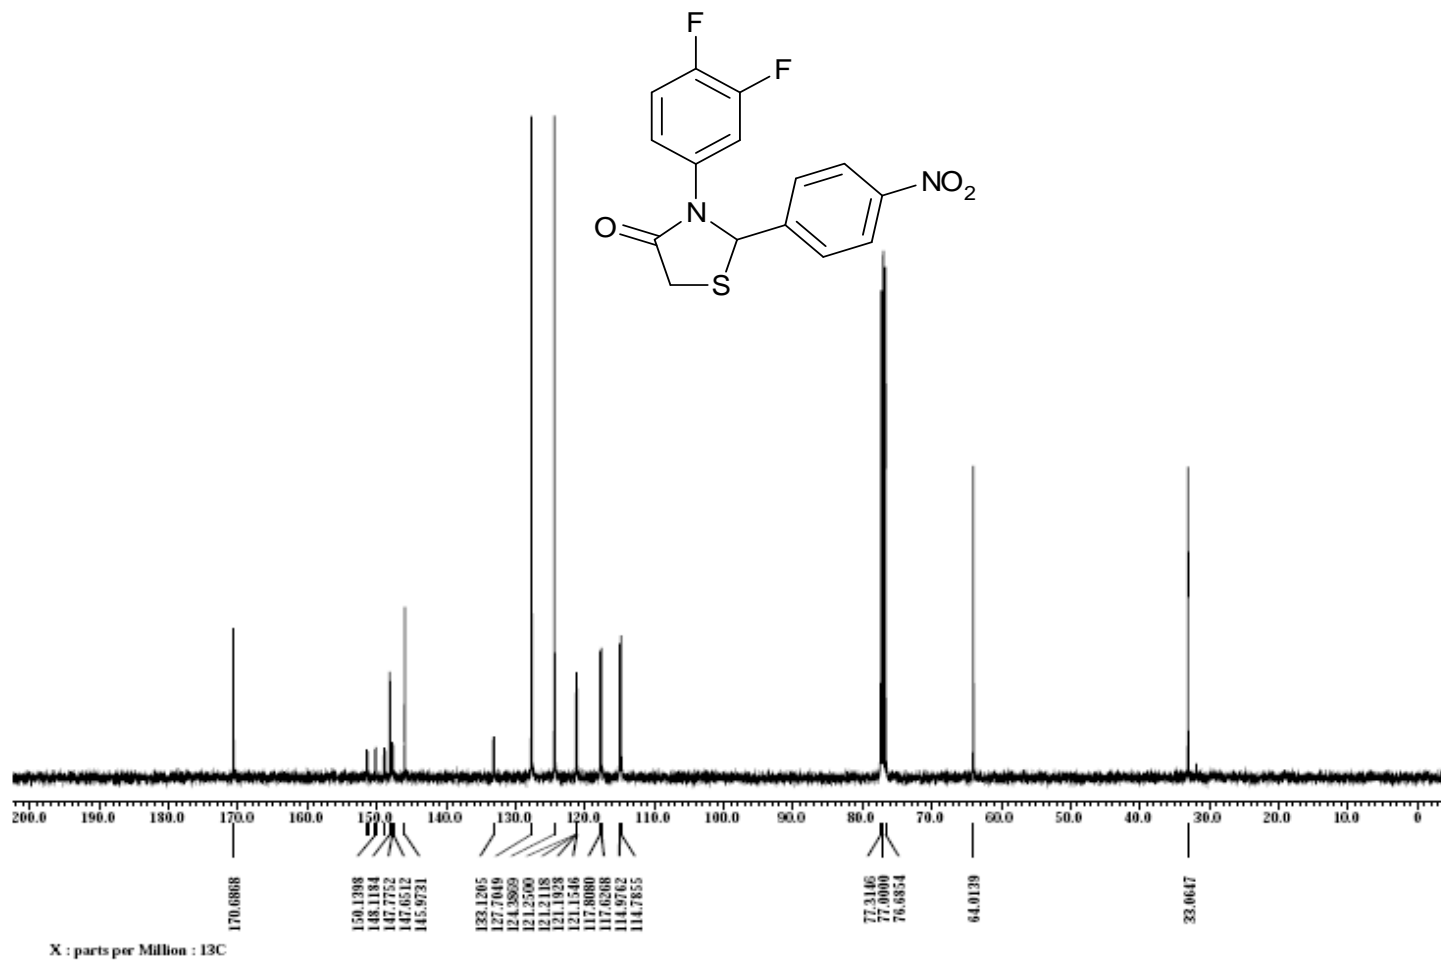

Figure 19. <sup>13</sup>C NMR spectrum of **4i**

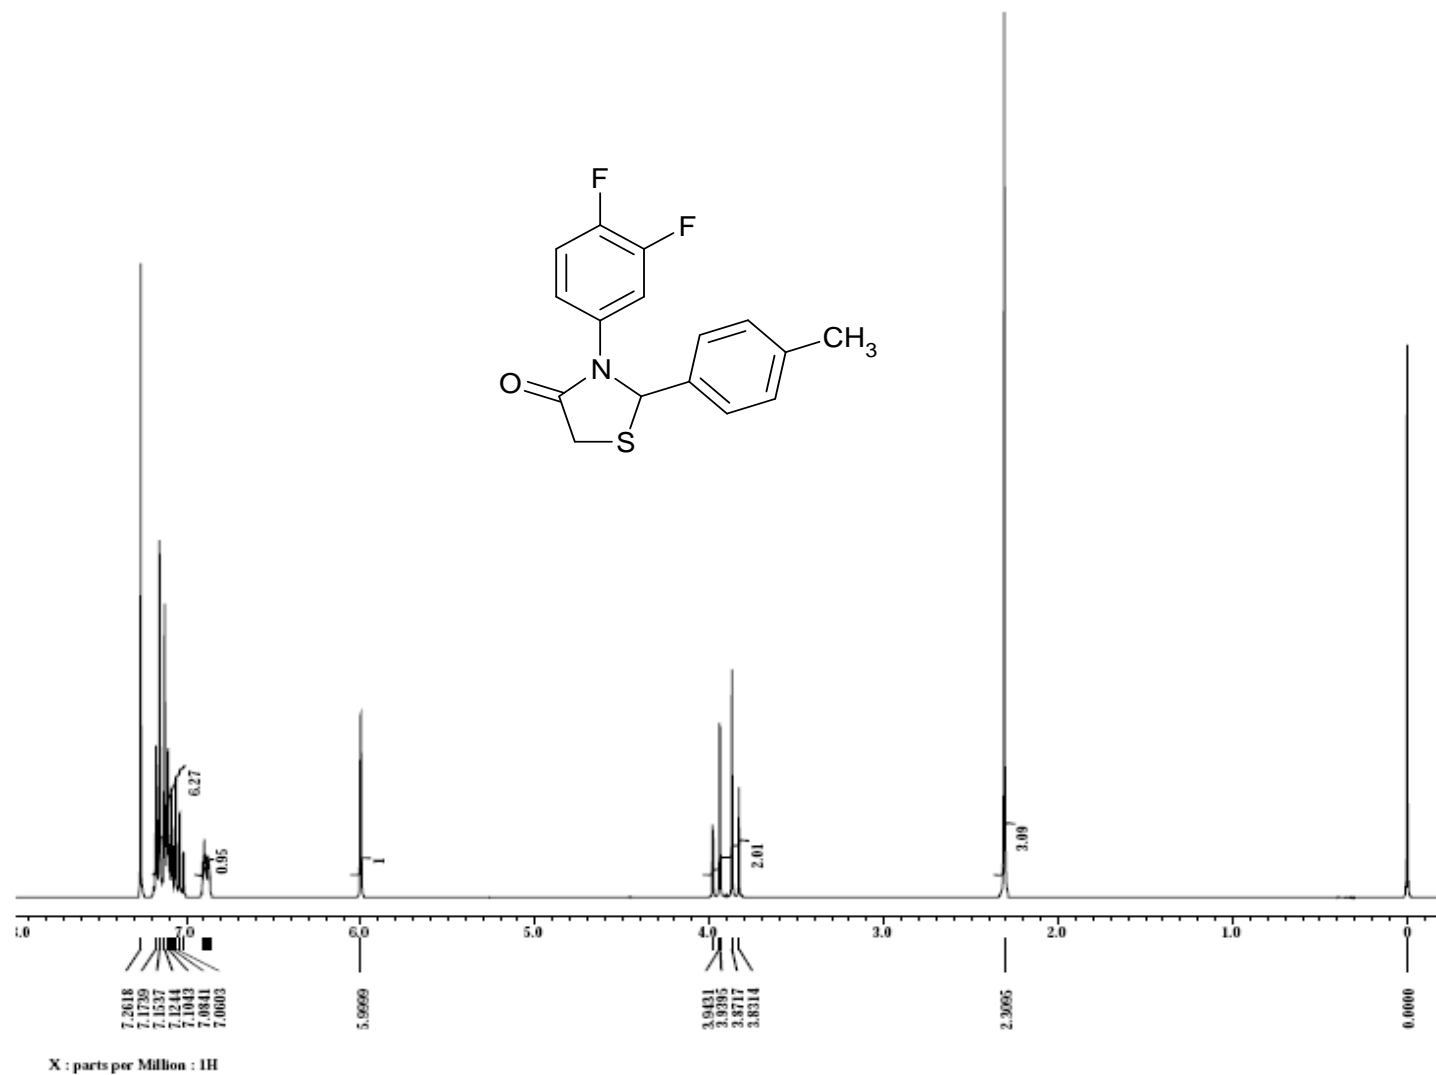

Figure 20. <sup>1</sup>H NMR spectrum of **4j**

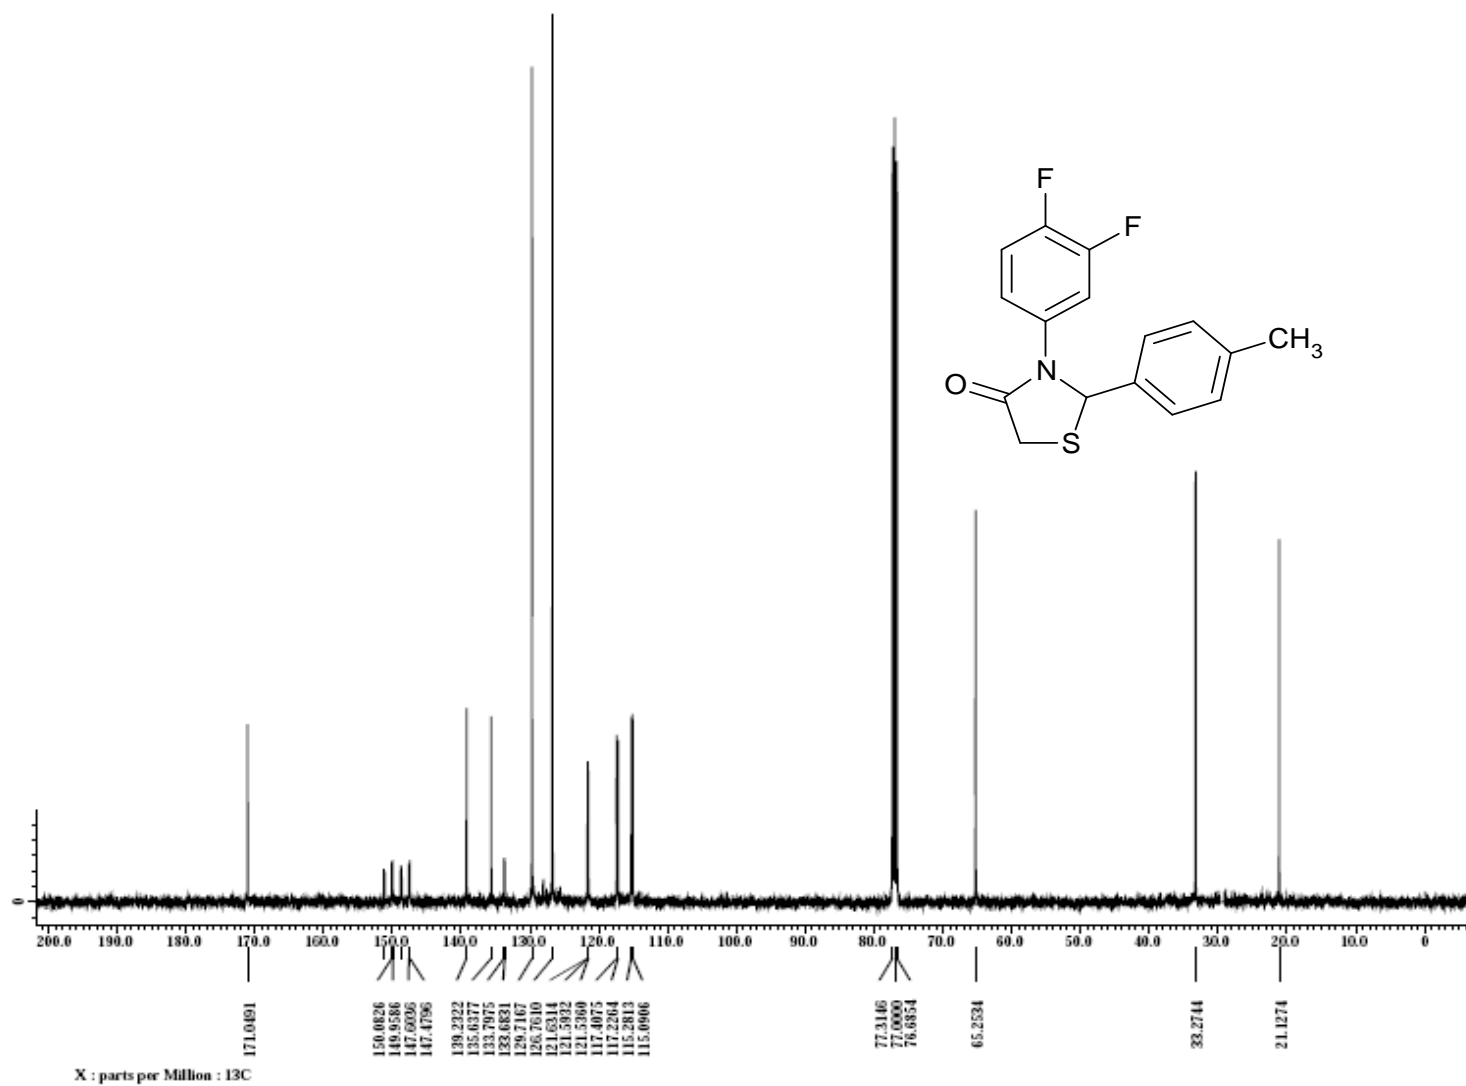

Figure 21.  $^{13}\text{C}$  NMR spectrum of **4j**



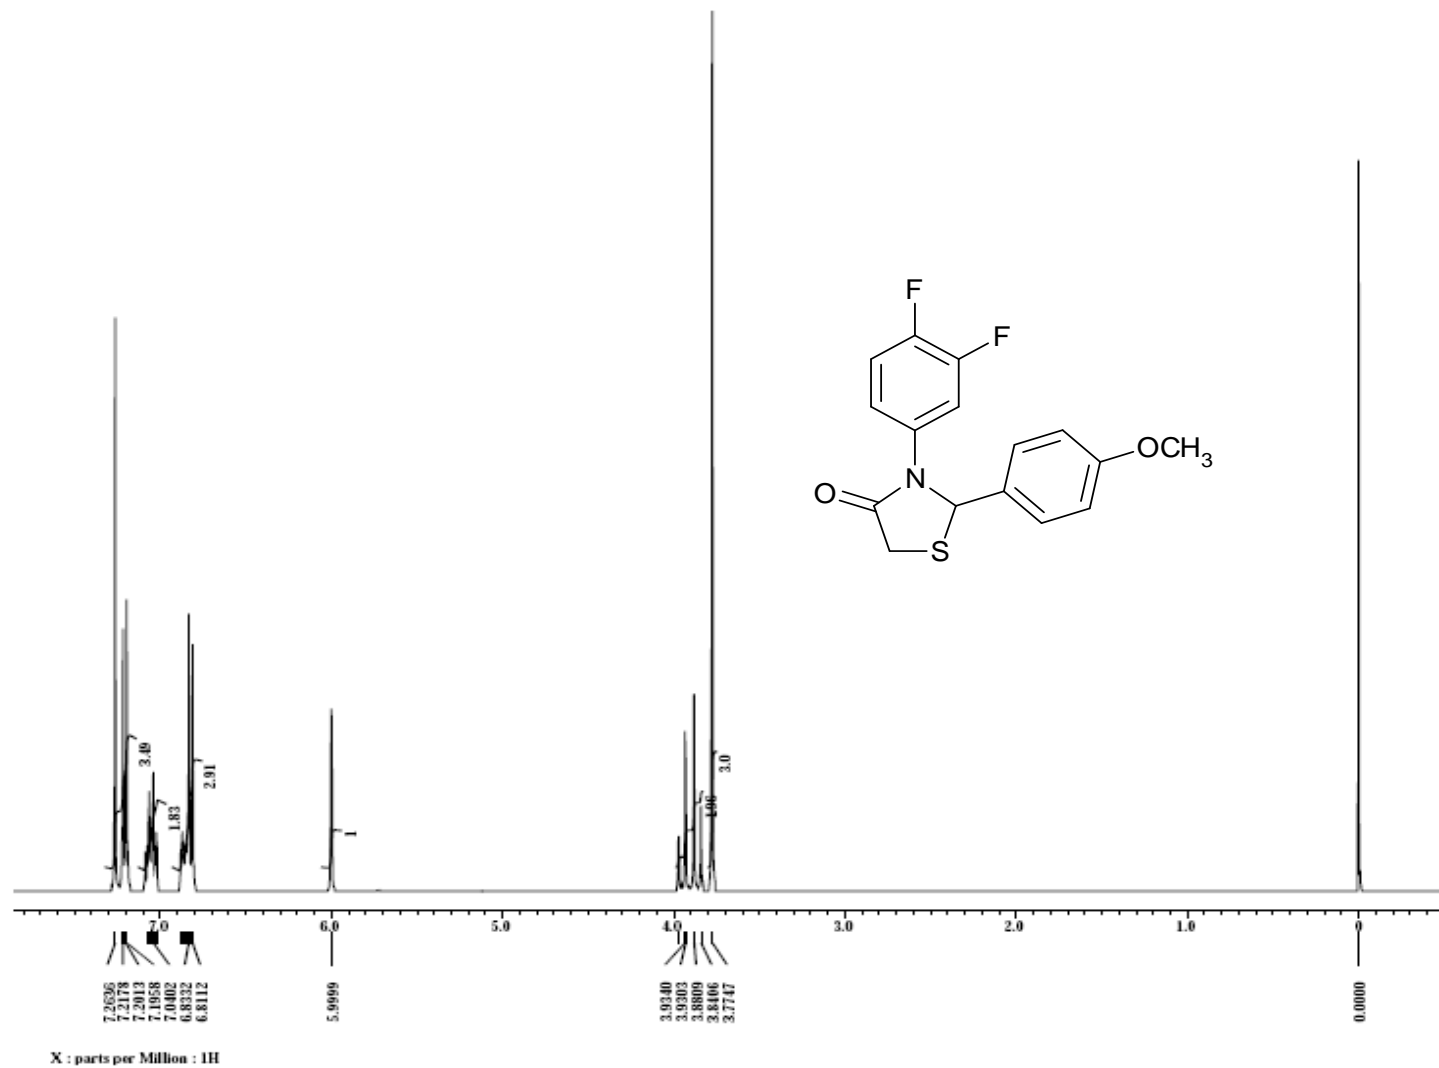

Figure 22. <sup>1</sup>H NMR spectrum of **4k**

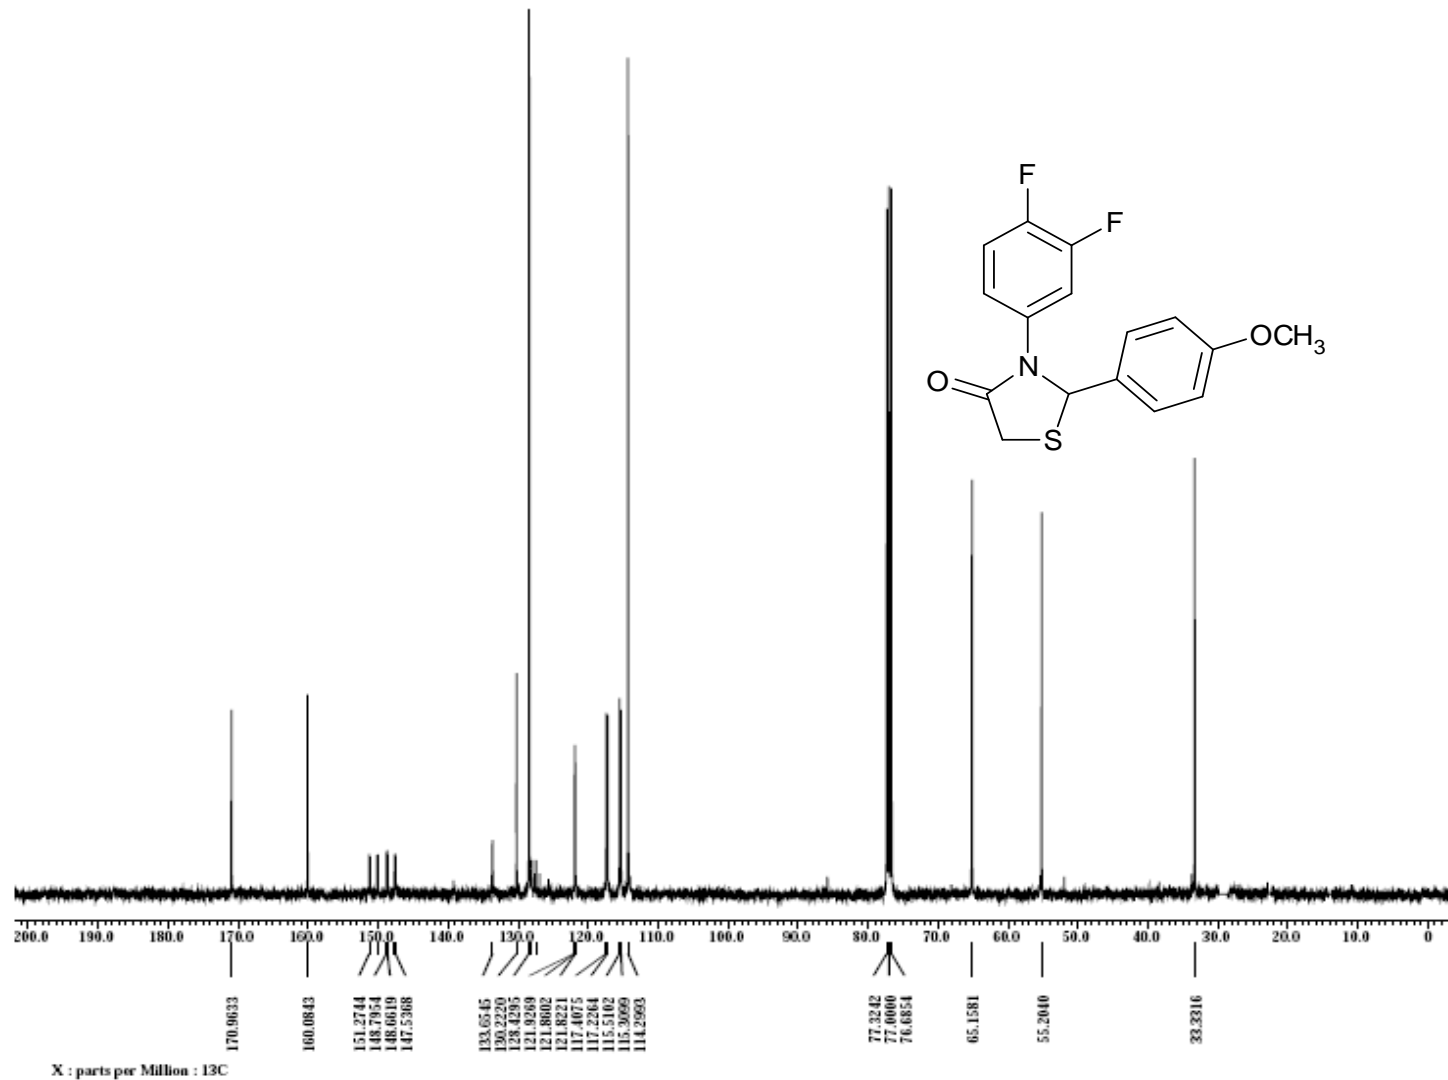

Figure 23.  $^{13}\text{C}$  NMR spectrum of **4k**

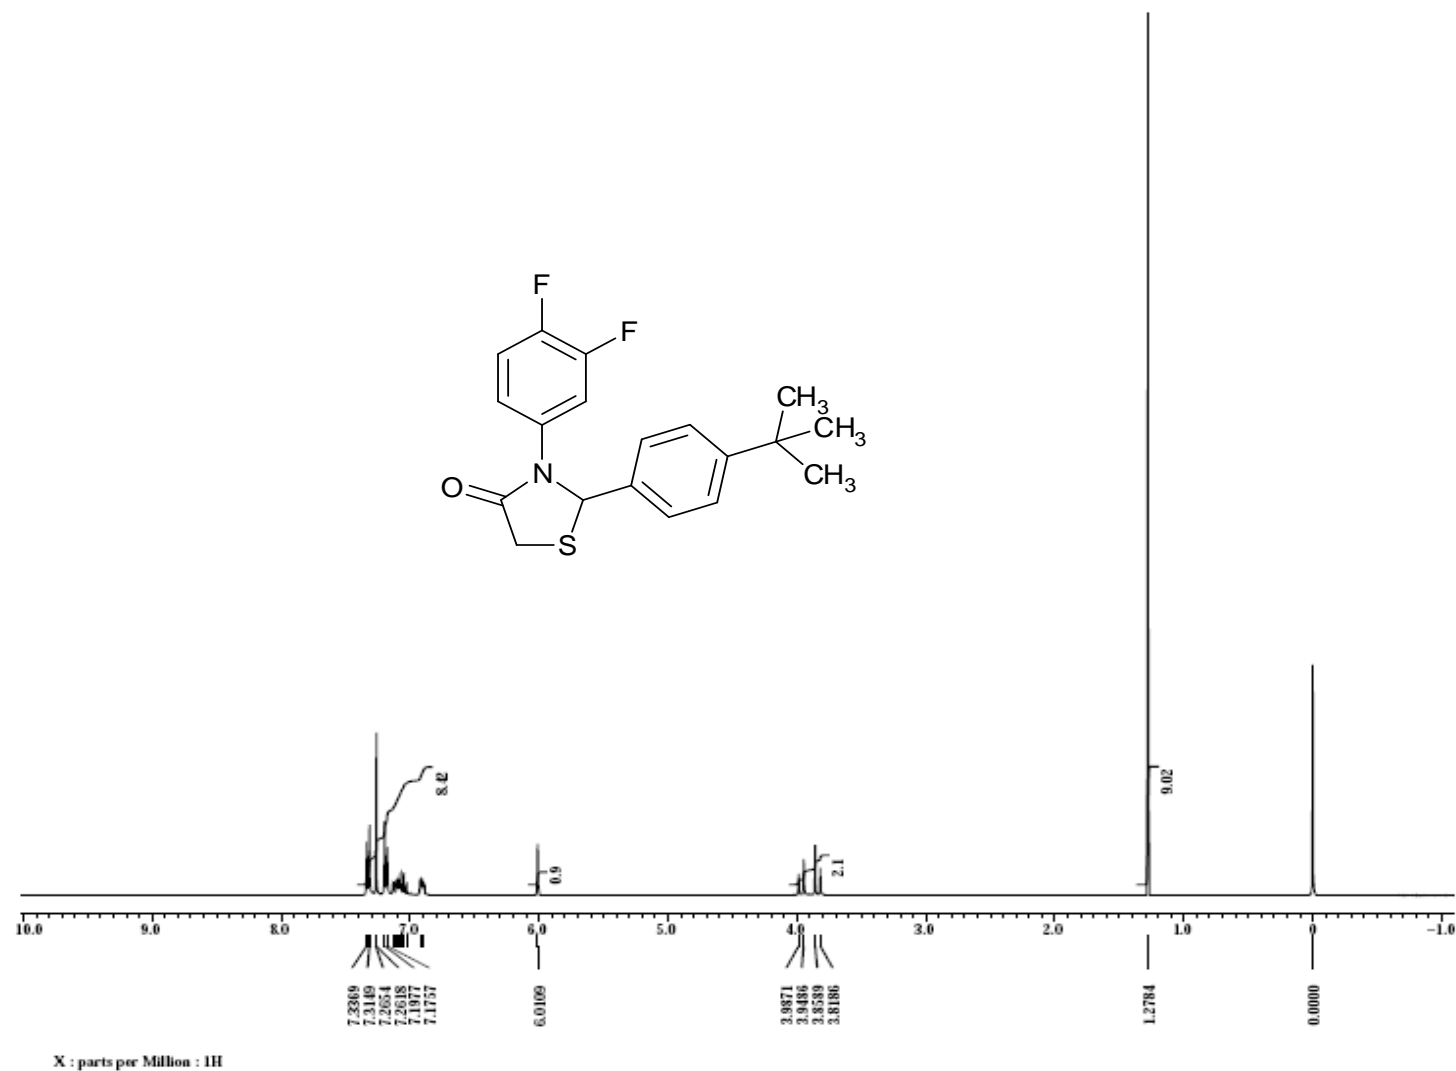

Figure 24.  $^1\text{H}$  NMR spectrum of **4l**

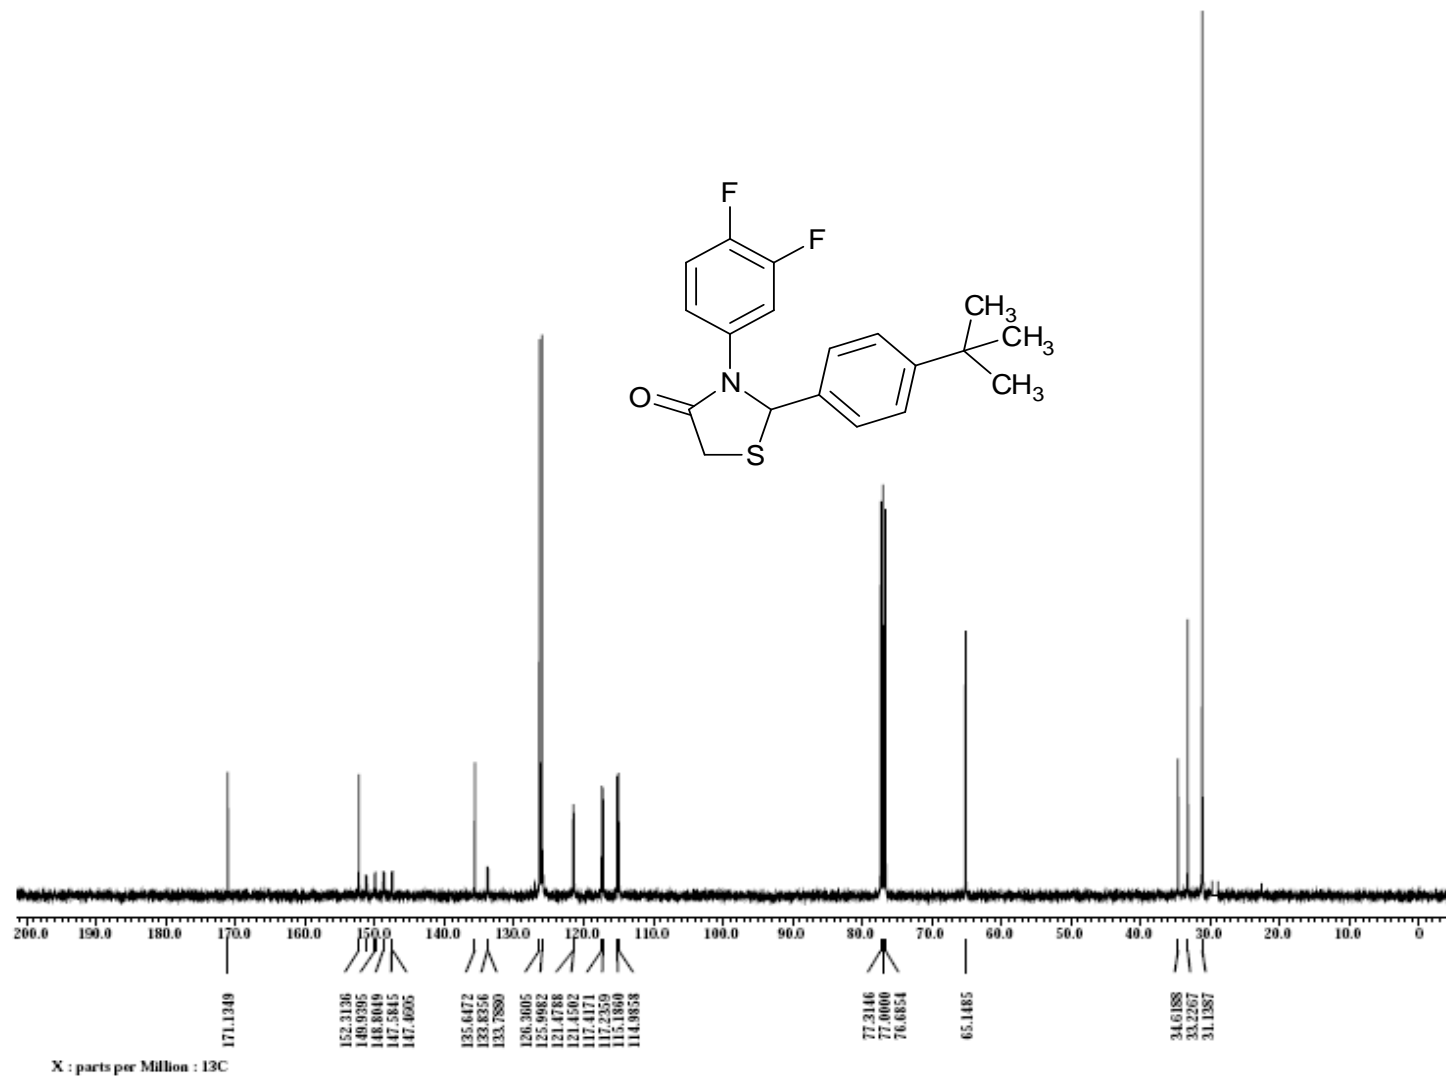

Figure 25.  $^{13}\text{C}$  NMR spectrum of **41**

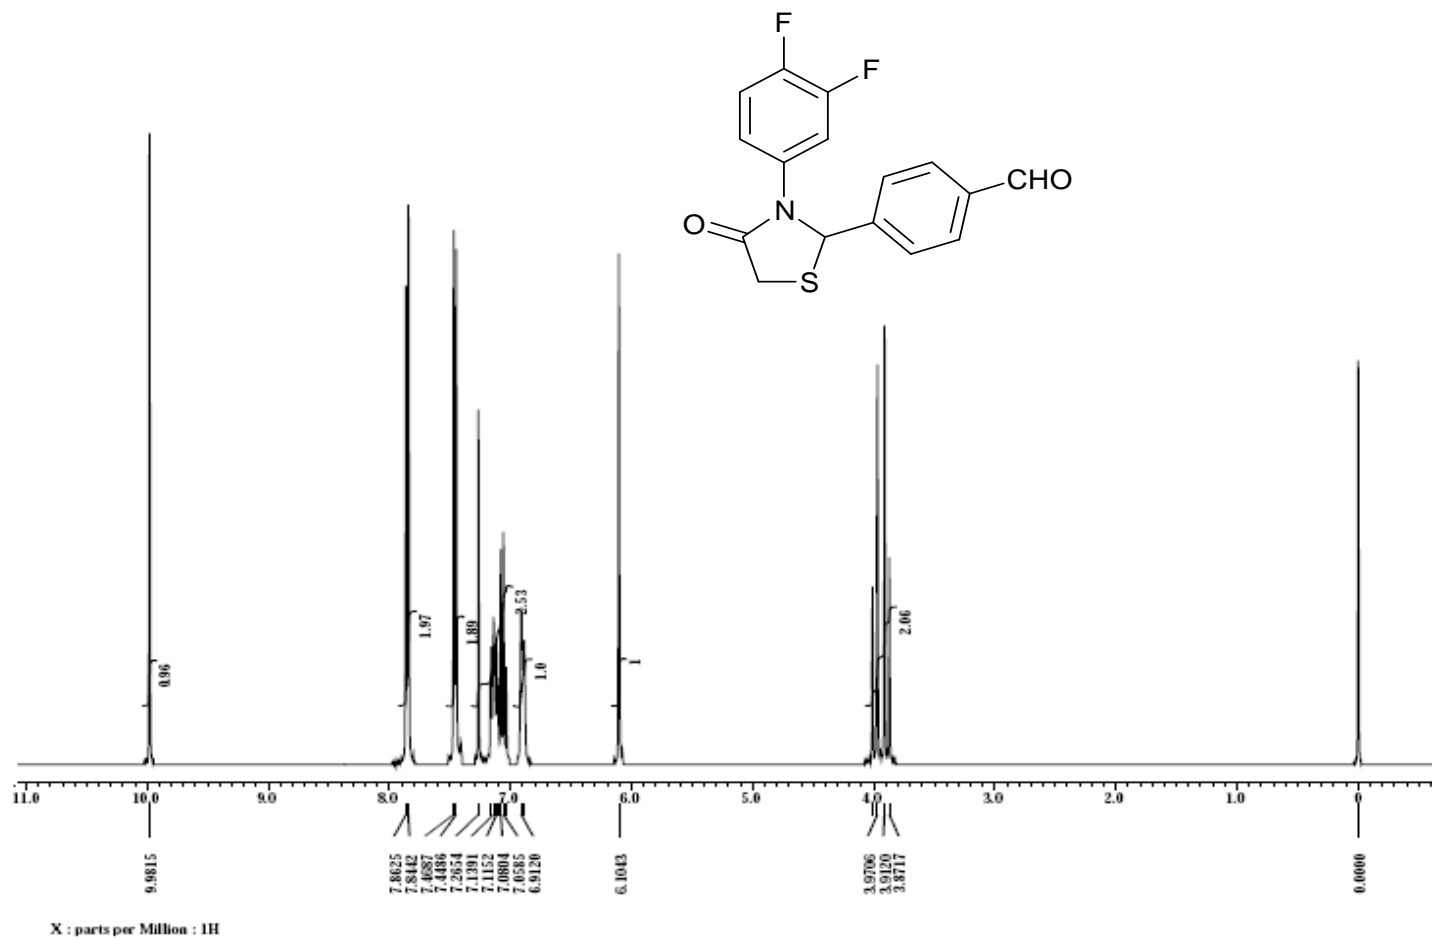

Figure 26. <sup>1</sup>H NMR spectrum of **4m**

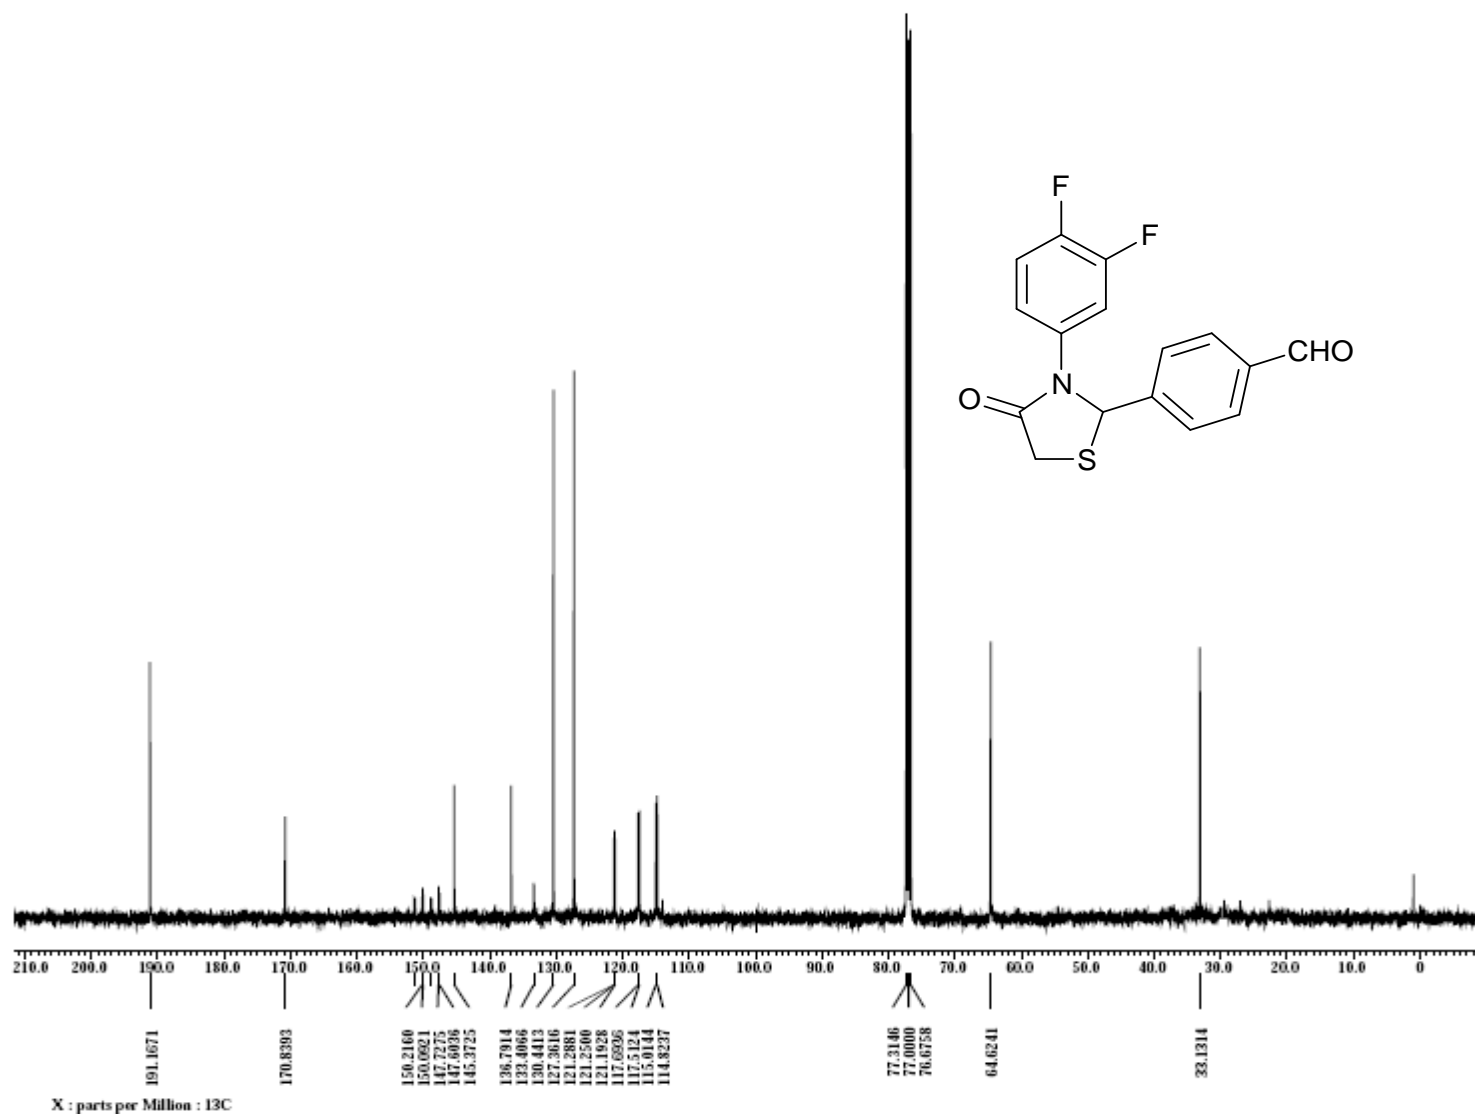

Figure 27.  $^{13}\text{C}$  NMR spectrum of **4m**

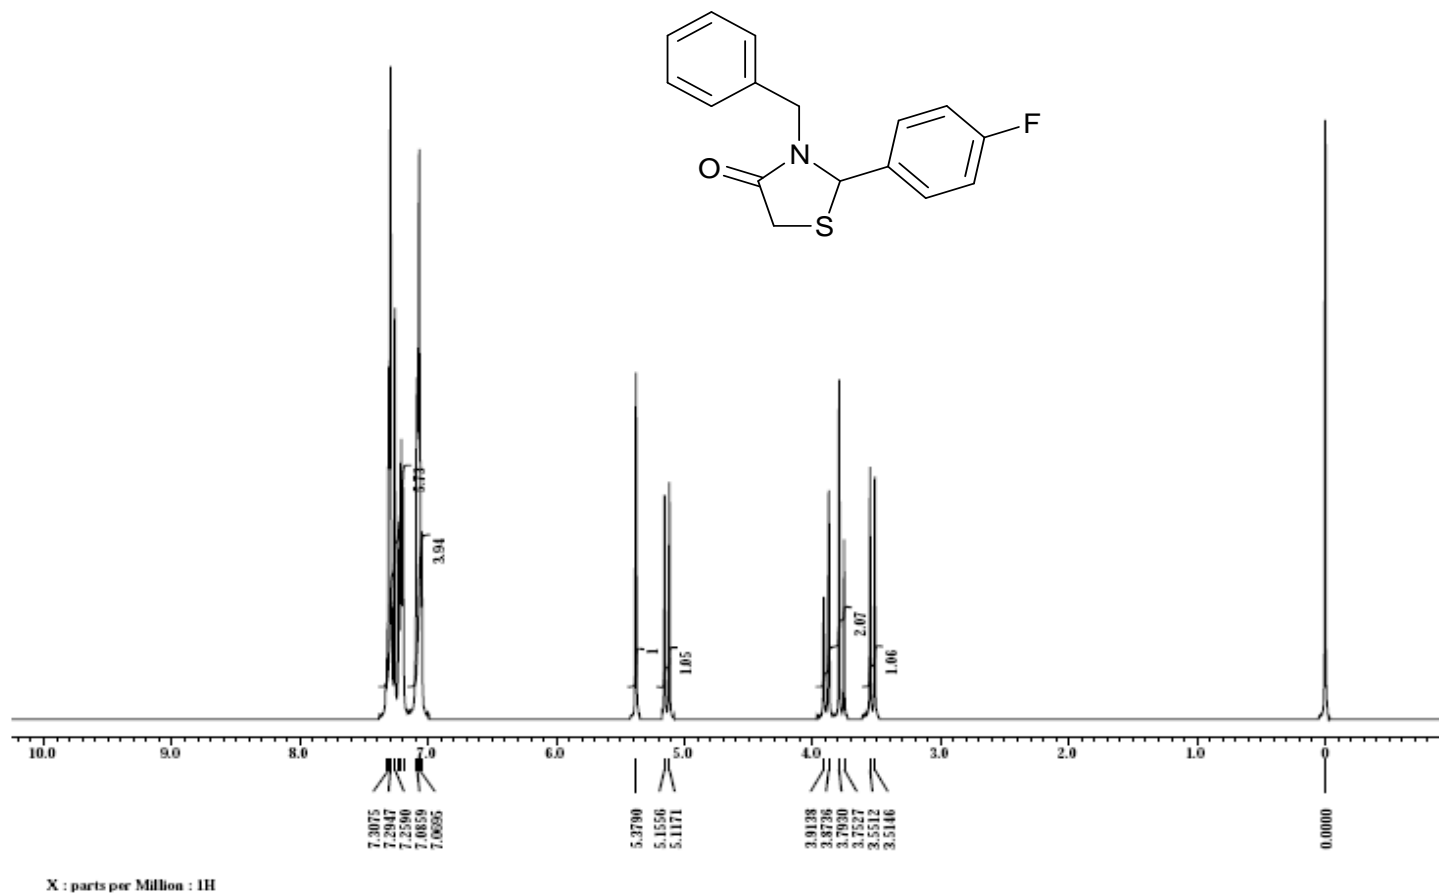

Figure 28. <sup>1</sup>H NMR spectrum of **4n**

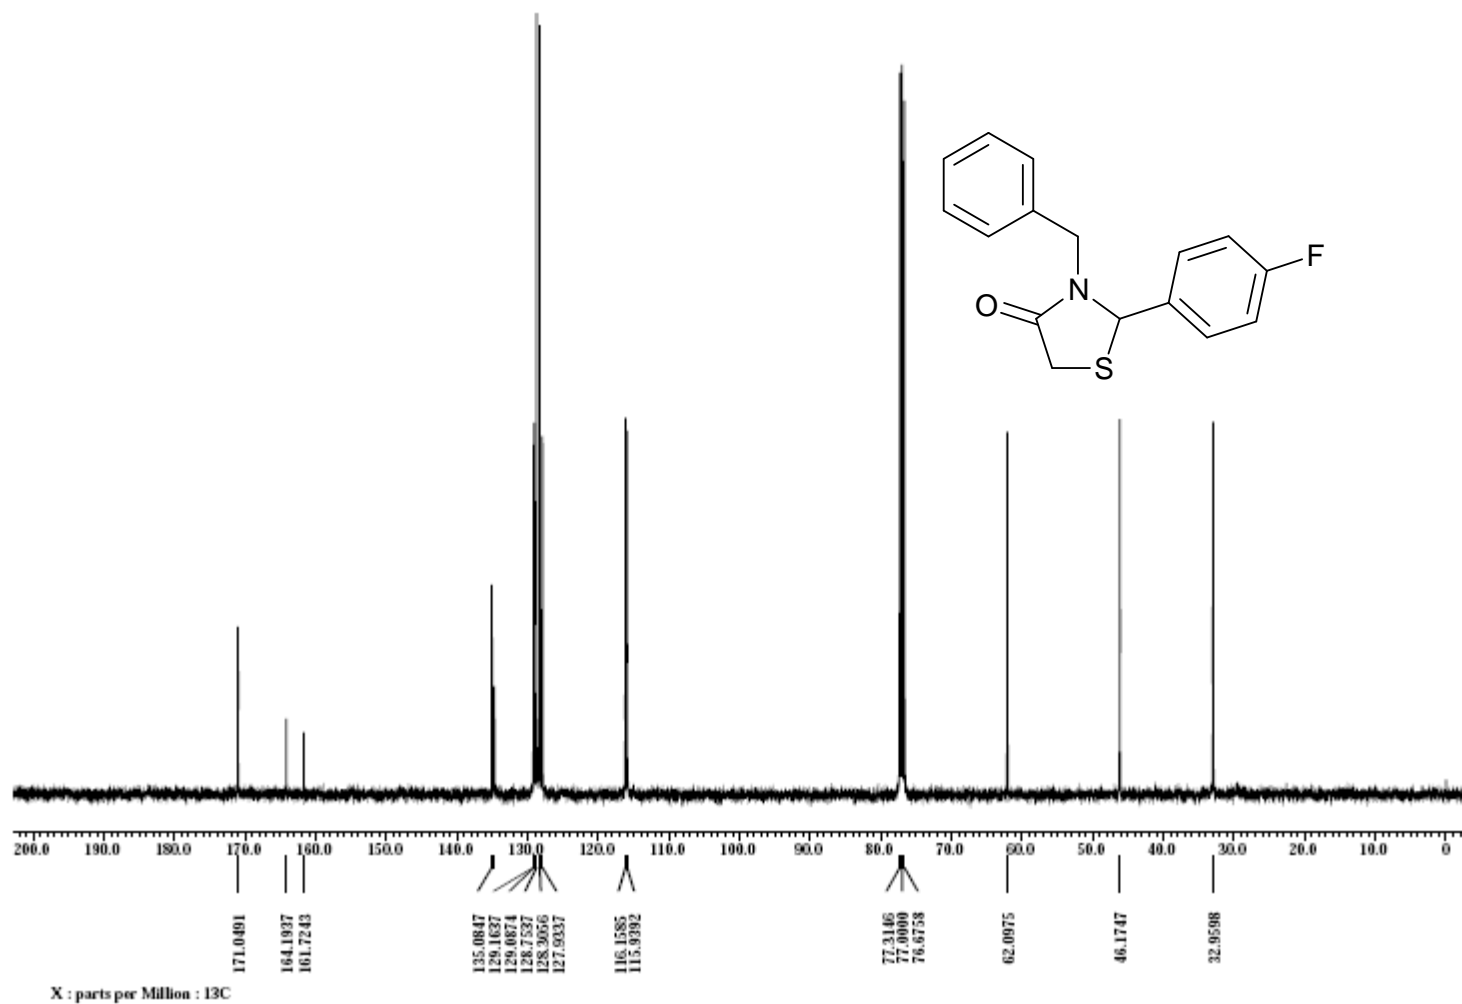

Figure 29.  $^{13}\text{C}$  NMR spectrum of **4n**



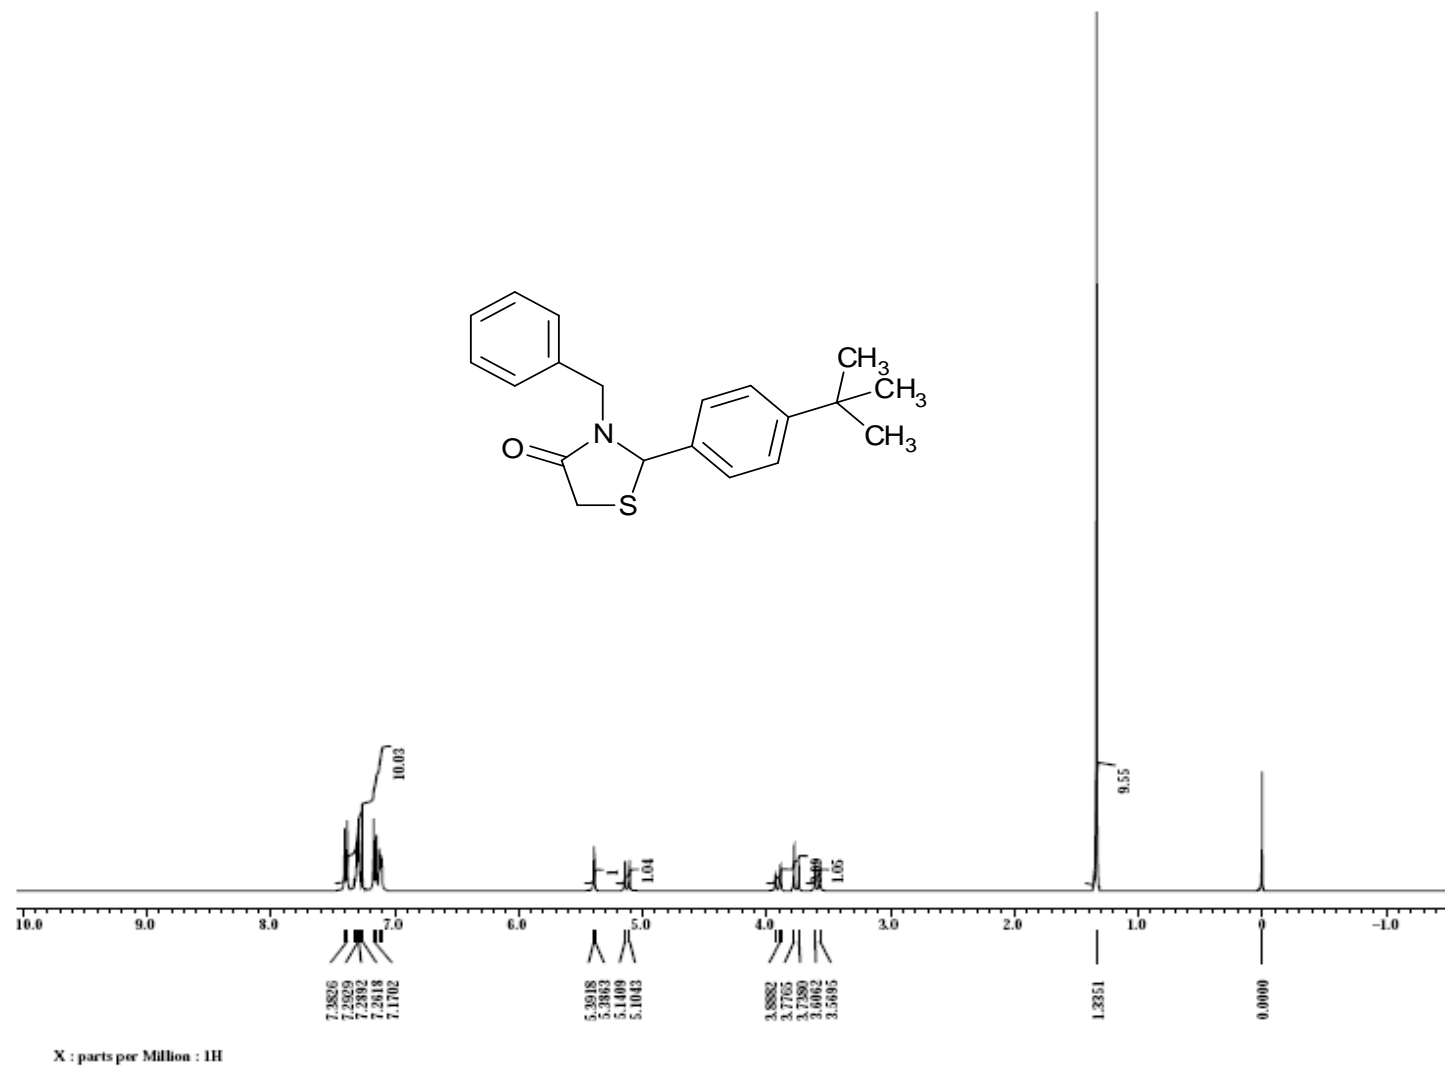

Figure 30. <sup>1</sup>H NMR spectrum of **4o**

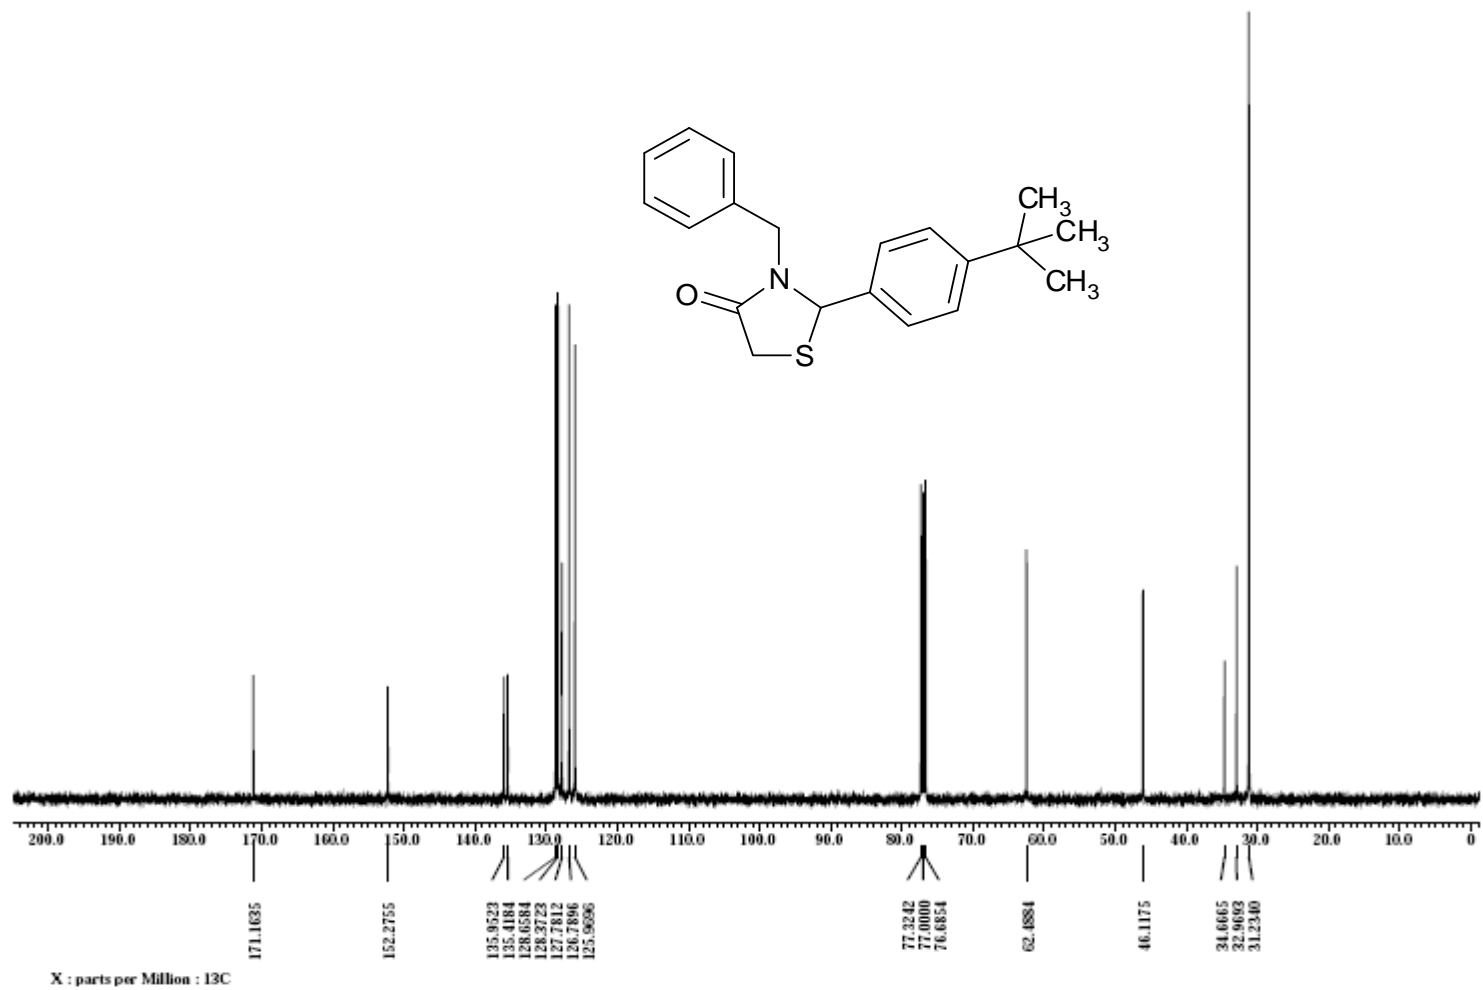

Figure 31.  $^{13}\text{C}$  NMR spectrum of **4o**
